# Supplementary material for: Trimerization of enones under air enabled by NHC/NaOtBu via a SET radical pathway
Source: Royal Society of Chemistry journal article supplement (doi:10.1039/c6qo00738d), 2016-12-27

## Trimerization of Enones under Air Enabled by NHC/NaOtBu via a SET Radical Pathway

Yuexia Zhang,<sup>[a]</sup> Xingxing Wu,<sup>[a]</sup> Lin Hao,<sup>[a]</sup> Zeng Rong Wong,<sup>[a]</sup> Sherman J. L. Lauw,<sup>[a]</sup> Song Yang,<sup>[b]</sup> Richard D. Webster\*<sup>[a]</sup> and Yonggui Robin Chi\*<sup>[a][b]</sup>

<sup>[a]</sup> Division of Chemistry & Biological Chemistry, School of Physical & Mathematical Sciences, Nanyang Technological University, Singapore 637371, Singapore

<sup>[b]</sup> Laboratory Breeding Base of Green Pesticide and Agricultural Bioengineering, Key Laboratory of Green Pesticide and Agricultural Bioengineering, Ministry of Education, Guizhou University, Huaxi District, Guiyang 550025, China

\*Correspondence to: Richard D. Webster (webster@ntu.edu.sg); Yonggui Robin Chi (robinchi@ntu.edu.sg)

### Supporting Information

#### Contents

|                                                                                                   |        |
|---------------------------------------------------------------------------------------------------|--------|
| I: General information.....                                                                       | S2     |
| II: General procedures for Table 1 (entry 2) and Table 2.....                                     | S3     |
| III: Summary of condition optimization (Table S1-S3).....                                         | S4-5   |
| IV: Proposed reaction pathway to <b>2a</b> (Scheme S1).....                                       | S6     |
| V: Cyclic voltammograms of <b>1a</b> and <b>1n</b> (Figure S1-S2).....                            | S7     |
| VI: Mechanistic Study with LC-MS .....                                                            | S8-9   |
| VII: Characterization of products .....                                                           | S10-19 |
| VIII: <sup>1</sup> H NMR, <sup>13</sup> C NMR, <sup>13</sup> C DEPT-135 spectra of products ..... | S20-47 |

## I: General Information

Commercially available materials purchased from Alfa Aesar, Merck or Aldrich were used as received. Proton nuclear magnetic resonance ( $^1\text{H}$  NMR) spectra were recorded on a Bruker AV400 (400 MHz) spectrometer. Chemical shifts were recorded in parts per million (ppm,  $\delta$ ) relative to tetramethylsilane ( $\delta$  0.00).  $^1\text{H}$  NMR splitting patterns are designated as singlet (s), doublet (d), triplet (t), quartet (q), dd (doublet of doublets); m (multiplets), and etc. All first-order splitting patterns were assigned on the basis of the appearance of the multiplet. Splitting patterns that could not be easily interpreted are designated as multiplet (m) or broad (br). Carbon nuclear magnetic resonance ( $^{13}\text{C}$  NMR) spectra were recorded on a Bruker AV400 (100 MHz) spectrometer. High resolution mass spectral analysis (HRMS) was performed on Waters Q-TOF Premier mass spectrometer. IR spectra were recorded on a Shimadzu IRPrestige-21 FT-IR spectrometer as neat thinfilms between NaCl plates in case of liquids and as KBr pellets in the case of solids. LC-MS were recorded on ThermoFinnigan LCQ Fleet MS. Melting points were measured on SRS Optimelt Automated Point System SRS. MPA100. Flash chromatography was performed using Merck silica gel 60 with distilled solvents. Analytical thin-layer chromatography (TLC) was carried out on Merck 60 F254 pre-coated silica gel plate (0.2 mm thickness). Visualization was performed using a UV lamp.

The X-ray crystallographic coordinates for structures reported in this article have been deposited at the Cambridge Crystallographic Data Centre (CCDC), under deposition numbers CCDC 1443861 (**2a**), CCDC 1443862 (**3a**).

## II: General Procedure for Table 1(entry 2) and Table 2

### *1: General procedures for Table 1 (entry 2)*

To a 4 mL sample vial equipped with a magnetic stir bar, was added imidazolium-based NHC (**L2**) (6.8 mg, 20 mol %), NaOtBu (15.0 mg, 1.5 equiv) and chalcone **1a** (0.1 mmol). The vial was closed with a plastic stopper after addition of 1.5 mL diethyl ether (purchased from Merk for analysis, used without further purification). The resulting mixture was stirred at room temperature. After the consumption of chalcone **1a** monitored by TLC, solvent was evaporated and the reaction mixture was then applied to silica gel chromatography (hexane/ethyl acetate = 10:1) to obtain product **3a**.

### *2: General procedures for Table 2*

To a 8 mL sample vial equipped with a magnetic stir bar, was added imidazolium-based NHC (**L2**) (13.6 mg, 20 mol %), NaOtBu (29.0 mg, 1.5 equiv) and enone **1** (0.2 mmol). The vial was closed with a plastic stopper after addition of 3.0 mL diethyl ether (purchased from Merk for analysis, used without further purification). In some cases, 200  $\mu$ L THF was added in order to increase the solubility of enones. The resulting mixture was stirred at room temperature. After the consumption of enone **1** monitored by TLC, solvent was evaporated and the reaction mixture was then applied to silica gel chromatography to obtain product **3**.

### III: Summary of Condition Optimization

**Table S1.** Solvent screening for trimerization of chalcone (**1a**)<sup>[a]</sup>

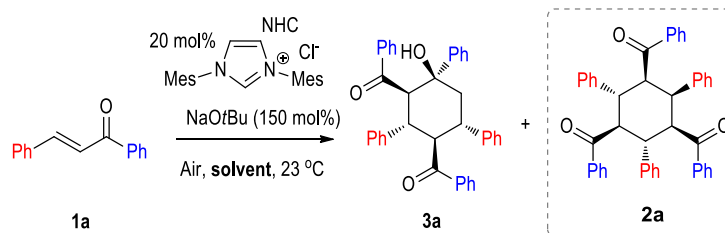

| Entry | Solvent            | <i>t</i> (h) | Yield of <b>3a</b> (%) <sup>[b]</sup> | Yield of <b>2a</b> (%) <sup>[b]</sup> |
|-------|--------------------|--------------|---------------------------------------|---------------------------------------|
| 1     | Et <sub>2</sub> O  | 18           | 80                                    | 11                                    |
| 2     | toluene            | 36           | 65                                    | trace                                 |
| 3     | CH <sub>3</sub> CN | 24           | 71                                    | trace                                 |
| 4     | 1,4-dioxane        | 24           | 57                                    | 20                                    |
| 5     | THF                | 24           | 55                                    | 4                                     |
| 6     | hexane             | 24           | 45                                    | 30                                    |
| 7     | DCM                | 24           | 29                                    | 20                                    |

<sup>[a]</sup> Reaction conditions: NHC (20 mol %), NaOtBu (1.5 equiv.), **1a** (0.1 mmol) and solvent (1.5 mL).

<sup>[b]</sup> Isolated yield.

**Table S2.** Base screening for trimerization of chalcone (**1a**)<sup>[a]</sup>

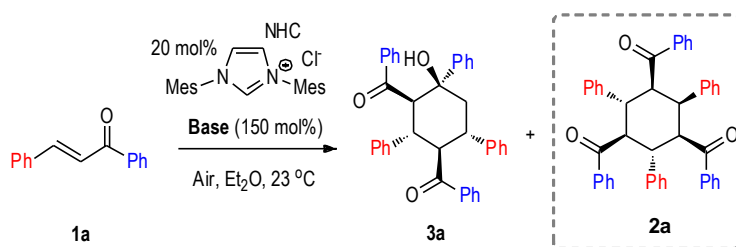

| Entry             | Base                           | <i>t</i> (h) | Yield of <b>3a</b> (%) <sup>[b]</sup> | Yield of <b>2a</b> (%) <sup>[b]</sup> |
|-------------------|--------------------------------|--------------|---------------------------------------|---------------------------------------|
| 1                 | NaOtBu                         | 18           | 80                                    | 11                                    |
| 2                 | KOtBu                          | 48           | 30                                    | 17                                    |
| 3 <sup>[c]</sup>  | Mg(OtBu) <sub>2</sub>          | 48           | 0                                     | 0                                     |
| 4 <sup>[c]</sup>  | Al(OtBu) <sub>3</sub>          | 48           | 0                                     | 0                                     |
| 5 <sup>[c]</sup>  | NaOH                           | 48           | 0                                     | 0                                     |
| 6 <sup>[c]</sup>  | NaOMe                          | 48           | 0                                     | 0                                     |
| 7 <sup>[c]</sup>  | KOMe                           | 48           | 0                                     | 0                                     |
| 8 <sup>[c]</sup>  | K <sub>2</sub> CO <sub>3</sub> | 48           | 0                                     | 0                                     |
| 9 <sup>[c]</sup>  | DBU                            | 48           | 0                                     | 0                                     |
| 10 <sup>[c]</sup> | Et <sub>3</sub> N              | 48           | 0                                     | 0                                     |

<sup>[a]</sup> Reaction conditions: NHC (20 mol %), base (1.5 equiv.), **1a** (0.1 mmol) and Et<sub>2</sub>O (1.5 mL).

<sup>[b]</sup> Isolated yield. <sup>[c]</sup> No reaction.

**Table S3.** Ligand or additive screening for trimerization of chalcone (**1a**)<sup>[a]</sup>

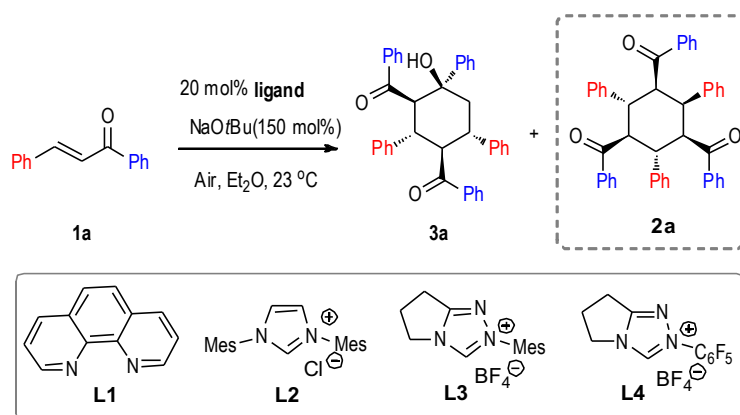

| Entry | Ligand    | <i>t</i> (h) | Yield of <b>3a</b> (%) <sup>[b]</sup> | Yield of <b>2a</b> (%) <sup>[b]</sup> |
|-------|-----------|--------------|---------------------------------------|---------------------------------------|
| 1     | <b>L1</b> | 24           | 59                                    | 14                                    |
| 2     | <b>L2</b> | 18           | 80                                    | 11                                    |
| 3     | <b>L3</b> | 24           | 24                                    | 14                                    |
| 4     | <b>L4</b> | 24           | 0                                     | 19                                    |

<sup>[a]</sup> Reaction conditions: ligand (20 mol %), NaOtBu (1.5 equiv.), **1a** (0.1 mmol) and Et<sub>2</sub>O (1.5 mL).

<sup>[b]</sup> Isolated yield.

#### IV: Proposed reaction pathway to **2a**

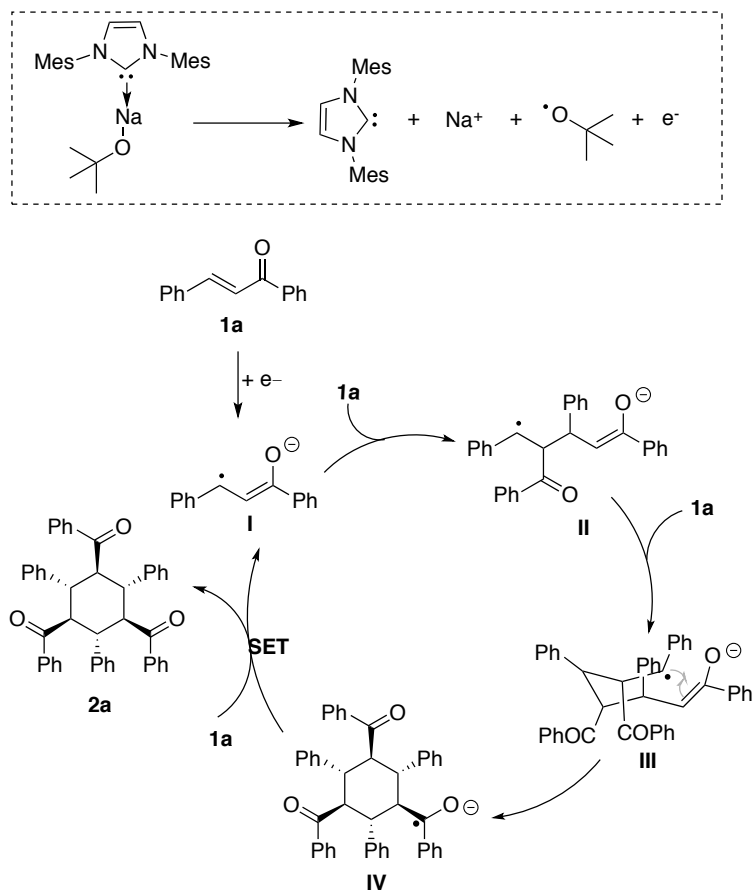

**Scheme S1.** Proposed reaction pathway to **2a**

A plausible mechanism for **2a** is depicted in Scheme S1. Initially, one electron reduction of chalcone **1a** by NHC/NaOtBu gives radical anion **I**, which then adds to another molecule of **1a** to afford radical anion intermediate **II**. Intermediate **II** reacts with the third molecule of **1a** further to lead to radical anion **III**, which undergoes 6-exo-trig radical cyclization to generate intermediate **IV**. Finally, single-electron transfer from **IV** to **1a** to produce **2a** with the generation of intermediate **I**.

### V: Cyclic voltammograms of 1a and 1n

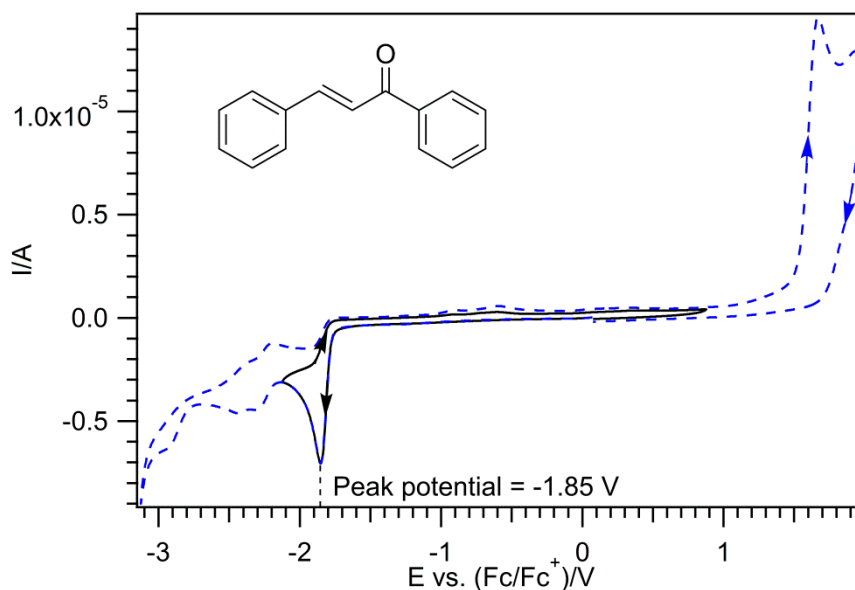

**Figure S1.** Cyclic voltammograms of 5 mM of analyte recorded at a 1 mm diameter planar circular glassy carbon electrode in acetonitrile containing 0.2 M *n*-Bu<sub>4</sub>NPF<sub>6</sub> as the supporting electrolyte, at a scan rate of 0.1 mV s<sup>-1</sup> and at 22 ± 2 °C.

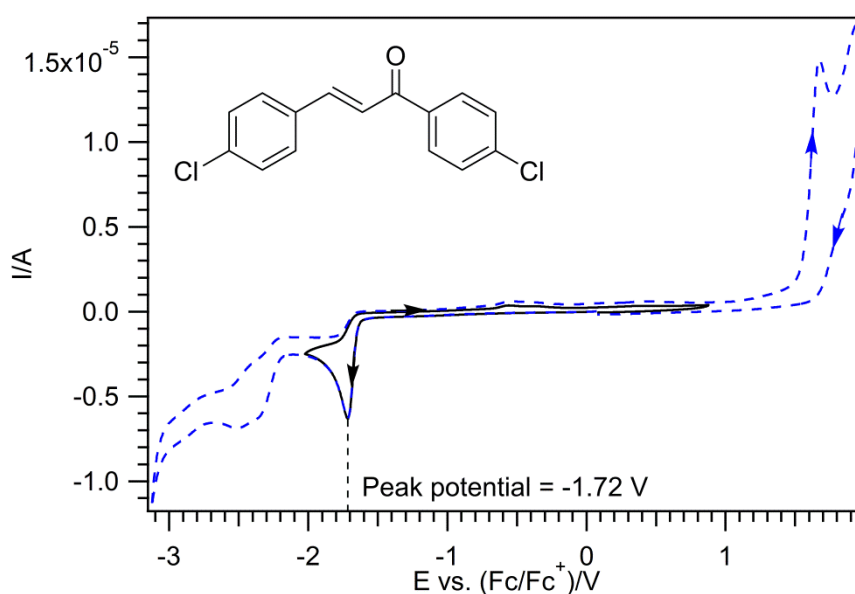

**Figure S2.** Cyclic voltammograms of 5 mM of analyte recorded at a 1 mm diameter planar circular glassy carbon electrode in acetonitrile containing 0.2 M *n*-Bu<sub>4</sub>NPF<sub>6</sub> as the supporting electrolyte, at a scan rate of 0.1 mV s<sup>-1</sup> and at 22 ± 2 °C.

## VI: Mechanistic Study with LC-MS

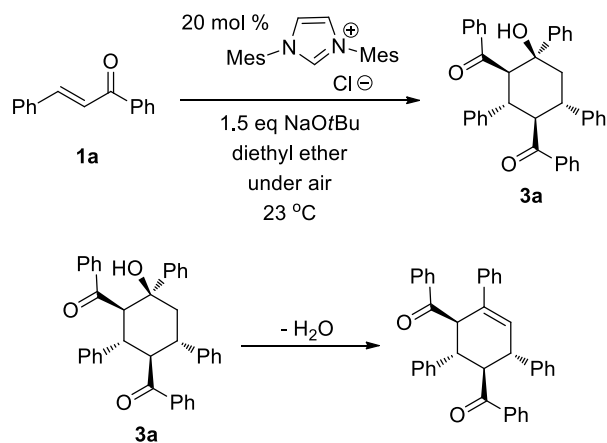

### 1. 20 mol% NHC precursor L2 and 1.5 equiv. NaOtBu in diethyl ether stirred for 1h

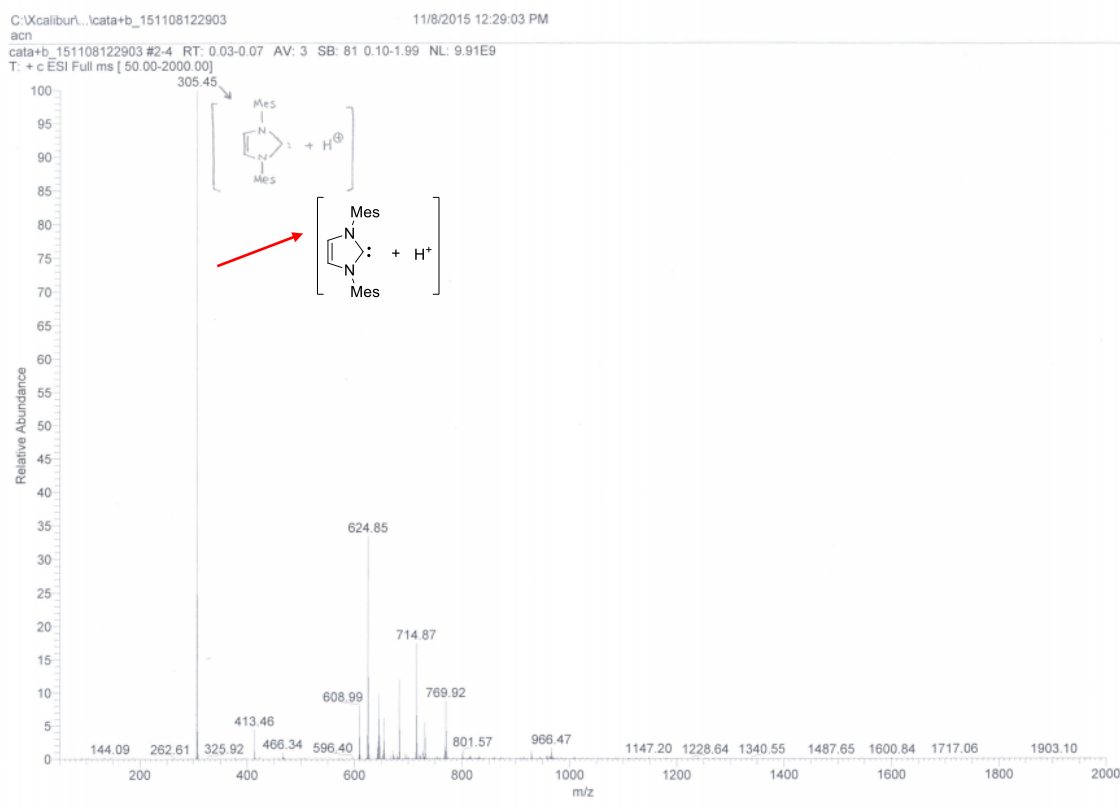



## 2. product 3a

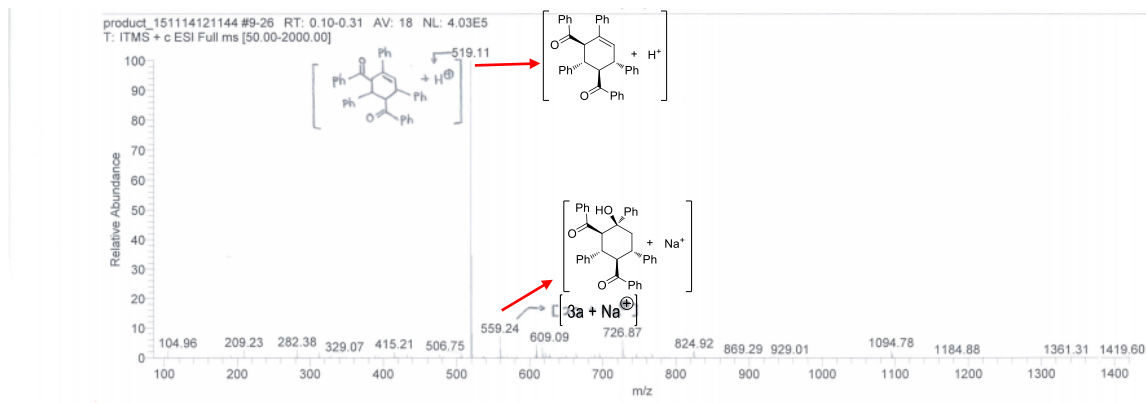

## 3. chalcone 1a, 20 mol% NHC precursor L2 and 1.5 equiv. of NaOtBu in diethyl ether stirred for 8 h

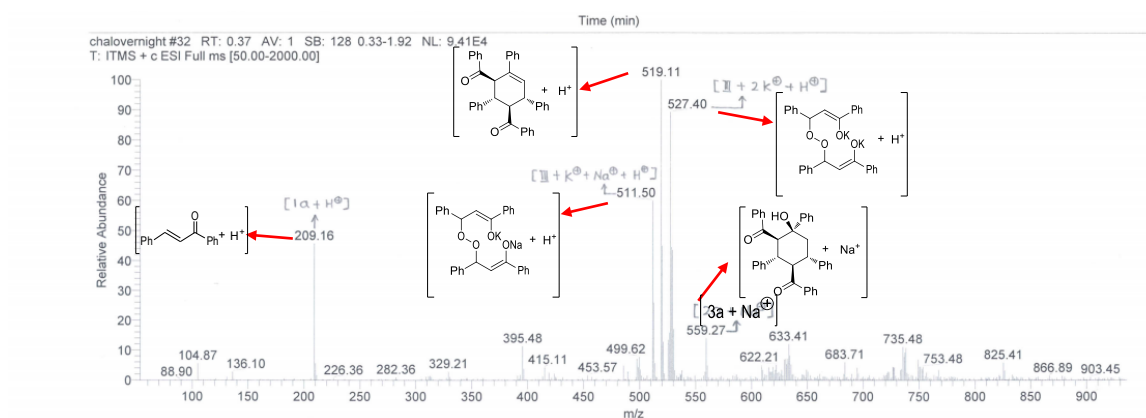

## 4. chalcone 1a, 20 mol% NHC precursor L2 and 1.5 equiv. of NaOtBu in diethyl ether stirred for 20 h

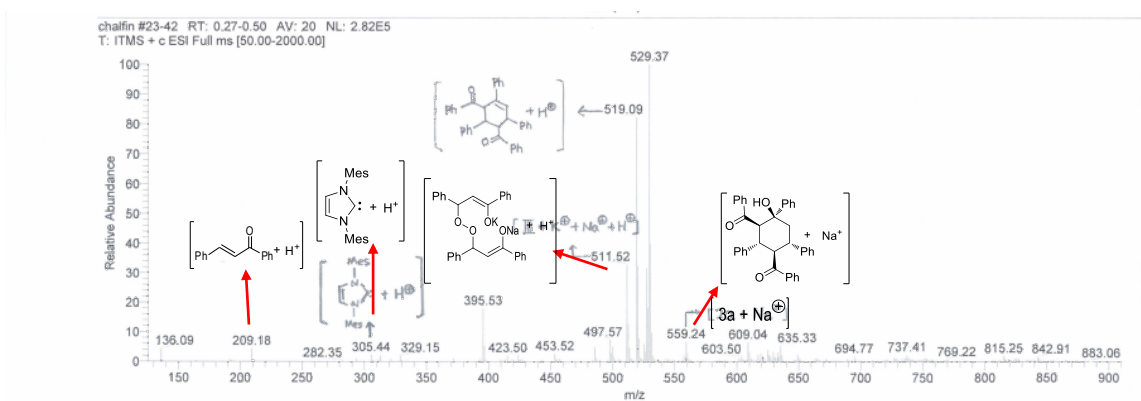

## VII: Characterization of Products

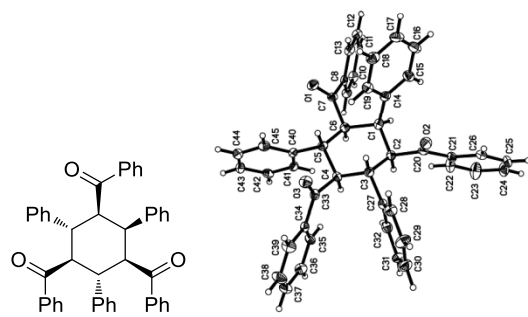

**2a**

### 2,4,6-triphenylcyclohexane-1,3,5-triyltris(phenylmethanone)

**<sup>1</sup>H NMR:** (400 MHz, CDCl<sub>3</sub>) δ 7.65 – 7.62 (m, 4H), 7.47 (t, *J* = 7.2 Hz, 2H), 7.38 – 7.30 (m, 8H), 7.20 – 7.12 (m, 4H), 7.10 – 6.94 (m, 10H), 6.86 (t, *J* = 7.2 Hz, 2H), 4.77 (dd, *J* = 12.0, 5.2 Hz, 2H), 4.45 (t, *J* = 12.0 Hz, 2H), 4.19 (t, *J* = 11.6 Hz, 1H), 3.99 (t, *J* = 5.2 Hz, 1H);

**<sup>13</sup>C NMR:** (100 MHz, CDCl<sub>3</sub>) δ 204.90, 197.71, 141.36, 138.78, 137.30, 135.88, 132.68, 131.74, 130.31, 128.59, 128.32, 128.21, 128.10, 127.68, 127.63, 127.43, 127.22, 126.63, 58.20, 53.55, 47.30, 43.37.

**HRMS:** (ESI) [M+H]<sup>+</sup> calcd. for C<sub>45</sub>H<sub>37</sub>O<sub>3</sub>, 625.2743 found, 625.2747;

**IR (KBr):**  $\nu_{\max}$  3024, 2916, 1681 (C=O), 1667 (C=O), 1589, 1450, 1265, 987, 694 cm<sup>-1</sup>

**mp** 302.9-303.4 °C

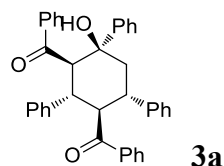

**3a**

### (4-hydroxy-2,4,6-triphenylcyclohexane-1,3-diyl)bis(phenylmethanone)

**<sup>1</sup>H NMR:** (400 MHz, CDCl<sub>3</sub>) δ 7.55 (d, *J* = 7.2 Hz, 2H), 7.29 – 6.95 (m, 20H), 6.83 (t, *J* = 7.6 Hz, 2H), 6.71 (t, *J* = 7.2 Hz, 1H), 5.39 (d, *J* = 2.4 Hz, 1H), 4.49 (d, *J* = 11.2 Hz, 1H), 4.26 – 4.14 (m, 2H), 4.10 – 4.02 (m, 1H), 2.56 – 2.48 (m, 1H), 2.26 (dd, *J* = 14.0, 3.6 Hz, 1H);

**<sup>13</sup>C NMR:** (100 MHz, CDCl<sub>3</sub>) δ 207.17, 203.58, 145.88, 142.07, 138.96, 138.61, 138.12, 132.65, 131.76, 128.35, 128.16, 128.06, 127.97, 127.69, 127.66, 127.54, 127.36, 126.98, 126.90, 126.69, 124.80, 75.33, 56.74, 56.72, 48.06, 45.83, 43.34.

**HRMS:** (ESI) [M+Na]<sup>+</sup> calcd. for C<sub>38</sub>H<sub>32</sub>O<sub>3</sub>Na, 559.2249 found 559.2252;

**IR (KBr):**  $\nu_{\max}$  3402 (OH), 1666 (C=O), 1643 (C=O), 1597, 1439, 1257, 1026, 802, 694 cm<sup>-1</sup>

**mp** 244.2-244.7 °C

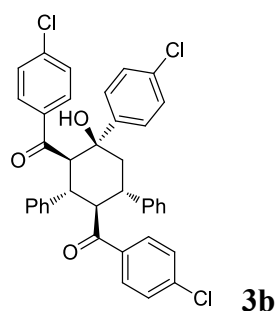

**(4-(4-chlorophenyl)-4-hydroxy-2,6-diphenylcyclohexane-1,3-diyl)bis((4-chlorophenyl)methanone)**

$^1\text{H NMR}$  (400 MHz,  $\text{CDCl}_3$ )  $\delta$  7.47 (d,  $J = 8.8$  Hz, 2H), 7.23 (t,  $J = 8.4$  Hz, 4H), 7.17 (d,  $J = 8.4$  Hz, 4H), 7.11 (t,  $J = 7.6$  Hz, 4H), 7.07 – 6.99 (m, 5H), 6.87 (t,  $J = 7.6$  Hz, 2H), 6.78 (t,  $J = 7.6$  Hz, 1H), 5.36 (d,  $J = 2.4$  Hz, 1H), 4.40 – 4.35 (m, 1H), 4.18 – 4.10 (m, 2H), 4.05 – 3.99 (m, 1H), 2.47 – 2.39 (m, 1H), 2.22 (dd,  $J = 14.0, 3.6$  Hz, 1H).

$^{13}\text{C NMR}$  (100 MHz,  $\text{CDCl}_3$ )  $\delta$  205.48, 202.13, 144.40, 141.57, 139.68, 138.35, 138.22, 136.98, 135.95, 133.02, 129.07, 128.72, 128.53, 128.41, 128.35, 128.25, 127.95, 127.81, 127.33, 127.02, 126.22, 75.09, 56.51, 56.30, 47.96, 45.65, 43.25.

**HRMS:** (ESI)  $[\text{M}+\text{Na}]^+$  calcd. for  $\text{C}_{38}\text{H}_{29}\text{O}_3\text{NaCl}_3$ , 661.1080 found, 661.1118;

**IR (KBr):**  $\nu_{\text{max}}$  3425 (OH), 1672 (C=O), 1651 (C=O), 1589, 1489, 1396, 1087, 833, 702, 532  $\text{cm}^{-1}$

**mp** 237.9-238.5  $^\circ\text{C}$

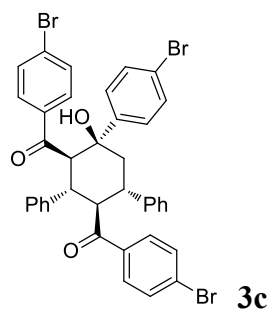

**(4-(4-bromophenyl)-4-hydroxy-2,6-diphenylcyclohexane-1,3-diyl)bis((4-bromophenyl)methanone)**

$^1\text{H NMR}$  (400 MHz,  $\text{CDCl}_3$ )  $\delta$  7.41 (d,  $J = 8.8$  Hz, 2H), 7.32 (d,  $J = 8.8$  Hz, 2H), 7.24 – 7.21 (m, 4H), 7.18 – 7.06 (m, 10H), 7.02 (t,  $J = 7.2$  Hz, 1H), 6.87 (t,  $J = 7.6$  Hz, 2H), 6.79 (t,  $J = 7.6$  Hz, 1H), 5.35 (d,  $J = 2.4$  Hz, 1H), 4.40 – 4.33 (m, 1H), 4.17 – 4.09 (m, 2H), 4.04 – 3.98 (m, 1H), 2.46 – 2.37 (m, 1H), 2.22 (dd,  $J = 14.0, 3.6$  Hz, 1H).

$^{13}\text{C NMR}$  (100 MHz,  $\text{CDCl}_3$ )  $\delta$  205.70, 202.33, 144.93, 141.53, 138.17, 137.39, 136.36, 131.38, 131.25, 130.93, 129.12, 128.82, 128.55, 128.37, 127.81, 127.36, 127.12, 127.04, 126.57,

121.21, 75.14, 56.53, 56.22, 47.96, 45.61, 43.24.

**HRMS:** (ESI)  $[M+Na]^+$  calcd. for  $C_{38}H_{29}O_3NaBr_3$ , 792.9564 found, 792.9537;

**IR (KBr):**  $\nu_{max}$  3441 (OH), 1666 (C=O), 1643 (C=O), 1581, 1489, 1396, 1072, 1002, 833, 702, 532  $cm^{-1}$

**mp** 256.8-258.0 °C

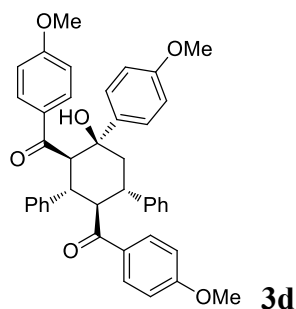

**(4-hydroxy-4-(4-methoxyphenyl)-2,6-diphenylcyclohexane-1,3-diyl)bis((4-methoxyphenyl)methanone)**

**$^1H$  NMR** (400 MHz,  $CDCl_3$ )  $\delta$  7.45 (d,  $J$  = 8.8 Hz, 2H), 7.35 – 7.31 (m, 4H), 7.26 (d,  $J$  = 7.2 Hz, 2H), 7.15 – 7.06 (m, 4H), 6.97 (t,  $J$  = 7.2 Hz, 1H), 6.84 (t,  $J$  = 7.6 Hz, 2H), 6.74 – 6.69 (m, 3H), 6.55 – 6.50 (m, 4H), 5.56 (d,  $J$  = 2.0 Hz, 1H), 4.44 – 4.36 (m, 1H), 4.19 – 4.12 (m, 2H), 4.07– 4.00 (m, 1H), 3.70 (s, 3H), 3.68 (s, 3H), 3.66 (s, 3H), 2.49 – 2.41 (m, 1H), 2.20 (dd,  $J$  = 14.0, 3.6 Hz, 1H).

**$^{13}C$  NMR** (100 MHz,  $CDCl_3$ )  $\delta$  204.97, 201.47, 163.21, 162.43, 158.26, 142.38, 139.02, 138.48, 131.84, 130.96, 130.36, 129.85, 128.26, 127.97, 127.92, 126.72, 126.56, 125.95, 113.40, 112.93, 112.74, 75.00, 55.95, 55.88, 55.26, 55.16, 55.11, 47.99, 46.28, 43.30.

**HRMS:** (ESI)  $[M+Na]^+$  calcd. for  $C_{41}H_{38}O_6Na$ , 649.2566 found, 649.2526;

**IR (KBr):**  $\nu_{max}$  3402 (OH), 1658 (C=O), 1597 (C=O), 1512, 1257, 1174, 1026, 833, 702, 540  $cm^{-1}$

**mp** 223.2-224.4 °C

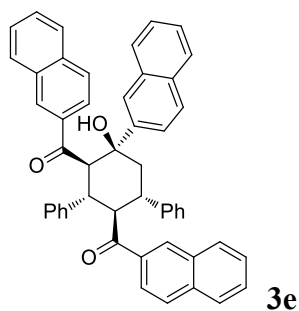

**(4-hydroxy-4-(naphthalen-2-yl)-2,6-diphenylcyclohexane-1,3-diyl)bis(naphthalen-2-**

**ylmethanone)**

**<sup>1</sup>H NMR** (400 MHz, CDCl<sub>3</sub>) δ 8.10 (s, 1H), 7.78 – 7.56 (m, 10H), 7.49 – 7.27 (m, 14H), 7.08 (t, *J* = 7.6 Hz, 2H), 6.91 (t, *J* = 7.2 Hz, 1H), 6.75 (t, *J* = 8.0 Hz, 2H), 6.55 (t, *J* = 7.2 Hz, 1H), 5.69 (d, *J* = 2.4 Hz, 1H), 4.84 (d, *J* = 11.6 Hz, 1H), 4.48 (t, *J* = 11.2 Hz, 1H), 4.37 (t, *J* = 11.2 Hz, 1H), 4.25 – 4.18 (m, 1H), 2.77–2.69 (m, 1H), 2.38 (dd, *J* = 14.0, 3.6 Hz, 1H).

**<sup>13</sup>C NMR** (100 MHz, CDCl<sub>3</sub>) δ 206.92, 203.39, 143.41, 142.17, 138.74, 136.32, 135.36, 135.03, 134.78, 133.10, 132.30, 131.93, 131.66, 129.86, 129.32, 129.30, 128.98, 128.57, 128.41, 128.35, 128.10, 128.00, 127.91, 127.87, 127.57, 127.48, 127.43, 127.26, 126.96, 126.79, 126.39, 126.19, 126.04, 125.73, 124.10, 123.55, 123.17, 123.00, 75.73, 56.88, 56.49, 48.37, 45.96, 43.53.

**HRMS:** (ESI) [M+H]<sup>+</sup> calcd. for C<sub>50</sub>H<sub>39</sub>O<sub>3</sub>, 687.2899 found, 687.2899;

**IR (KBr):** ν<sub>max</sub> 3410 (OH), 1666 (C=O), 1621 (C=O), 1512, 1357, 1180, 748 cm<sup>-1</sup>

**mp** 247.6-248.3 °C

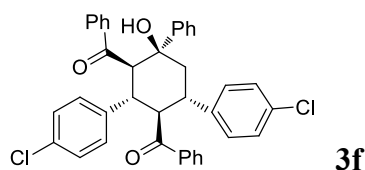

**(2,6-bis(4-chlorophenyl)-4-hydroxy-4-phenylcyclohexane-1,3-diyl)bis(phenylmethanone)**

**<sup>1</sup>H NMR** (400 MHz, CDCl<sub>3</sub>) δ 7.52 (d, *J* = 7.2 Hz, 2H), 7.29 – 7.15 (m, 10H), 7.12 – 7.02 (m, 9H), 6.80 (d, *J* = 8.4 Hz, 2H), 5.32 (d, *J* = 2.4 Hz, 1H), 4.48 – 4.40 (m, 1H), 4.21 – 4.10 (m, 2H), 4.08 – 3.99 (m, 1H), 2.51 – 2.39 (m, 1H), 2.22 (dd, *J* = 14.0, 3.6 Hz, 1H).

**<sup>13</sup>C NMR** (100 MHz, CDCl<sub>3</sub>) δ 206.68, 202.88, 145.43, 140.40, 138.46, 137.85, 137.11, 133.00, 132.70, 132.43, 132.33, 129.26, 128.51, 128.26, 128.24, 127.87, 127.66, 127.35, 127.18, 124.69, 75.22, 56.51, 56.46, 47.41, 45.69, 42.76.

**HRMS:** (ESI) [M+H]<sup>+</sup> calcd. for C<sub>38</sub>H<sub>31</sub>O<sub>3</sub>Cl<sub>2</sub>, 605.1650 found, 605.1650;

**IR (KBr):** ν<sub>max</sub> 3394 (OH), 1668 (C=O), 1631 (C=O), 1597, 1489, 1096, 1010, 694, 540 cm<sup>-1</sup>

**mp** 250.5-252.9 °C

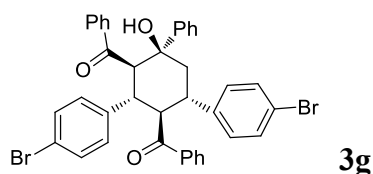

**(2,6-bis(4-bromophenyl)-4-hydroxy-4-phenylcyclohexane-1,3-diyl)bis(phenylmethanone)**

**<sup>1</sup>H NMR** (400 MHz, CDCl<sub>3</sub>) δ 7.52 (d, *J* = 7.6 Hz, 2H), 7.31 – 7.16 (m, 10H), 7.15 – 6.92 (m,

11H), 5.31 (d,  $J = 2.4$  Hz, 1H), 4.48 – 4.39 (m, 1H), 4.20 – 4.08 (m, 2H), 4.07 – 3.97 (m, 1H), 2.50 – 2.39 (m, 1H), 2.22 (dd,  $J = 14.0, 3.6$  Hz, 1H).

$^{13}\text{C}$  NMR (100 MHz,  $\text{CDCl}_3$ )  $\delta$  206.65, 202.84, 145.39, 140.90, 138.45, 137.85, 137.61, 133.00, 132.34, 131.47, 131.19, 129.63, 128.27, 127.89, 127.87, 127.65, 127.35, 127.19, 124.69, 120.87, 120.54, 75.20, 56.48, 56.34, 47.47, 45.63, 42.82.

HRMS: (ESI)  $[\text{M}+\text{Na}]^+$  calcd. for  $\text{C}_{38}\text{H}_{30}\text{O}_3\text{NaBr}_2$ , 715.0459 found, 715.0471;

IR (KBr):  $\nu_{\text{max}}$  3441 (OH), 1666 (C=O), 1631 (C=O), 1597, 1489, 1072, 1010, 694, 540  $\text{cm}^{-1}$   
mp 260.4-261.6  $^\circ\text{C}$

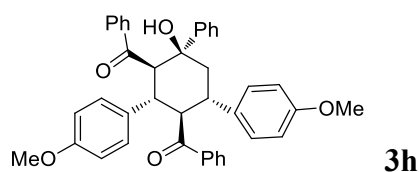

**(4-hydroxy-2,6-bis(4-methoxyphenyl)-4-phenylcyclohexane-1,3-diyl)bis(phenylmethanone)**

$^1\text{H}$  NMR (400 MHz,  $\text{CDCl}_3$ )  $\delta$  7.53 (d,  $J = 7.6$  Hz, 2H), 7.28 – 7.14 (m, 10H), 7.10 – 6.98 (m, 7H), 6.63 (d,  $J = 8.8$  Hz, 2H), 6.36 (d,  $J = 8.8$  Hz, 2H), 5.35 (d,  $J = 2.4$  Hz, 1H), 4.49 – 4.39 (m, 1H), 4.18 – 4.07 (m, 2H), 4.05 – 3.92 (m, 1H), 3.63 (s, 3H), 3.47 (s, 3H), 2.51 – 2.38 (m, 1H), 2.20 (dd,  $J = 14.0, 3.6$  Hz, 1H).

$^{13}\text{C}$  NMR (100 MHz,  $\text{CDCl}_3$ )  $\delta$  207.39, 203.92, 158.16, 145.93, 139.03, 138.17, 134.29, 132.60, 131.72, 130.75, 128.87, 128.13, 127.69, 127.67, 127.59, 127.40, 126.93, 124.78, 113.75, 113.50, 75.39, 57.26, 57.01, 55.11, 54.97, 47.23, 46.10, 42.52.

HRMS: (ESI)  $[\text{M}+\text{Na}]^+$  calcd. for  $\text{C}_{40}\text{H}_{36}\text{O}_5\text{Na}$ , 619.2460 found, 619.2462;

IR (KBr):  $\nu_{\text{max}}$  3417 (OH), 1666 (C=O), 1643 (C=O), 1512, 1249, 1033, 825, 694, 540  $\text{cm}^{-1}$   
mp 199.8-200.1  $^\circ\text{C}$

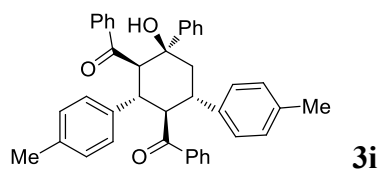

**(4-hydroxy-4-phenyl-2,6-di-p-tolylecyclohexane-1,3-diyl)bis(phenylmethanone)**

$^1\text{H}$  NMR (400 MHz,  $\text{CDCl}_3$ )  $\delta$  7.52 (d,  $J = 7.2$  Hz, 2H), 7.28 – 7.12 (m, 10H), 7.10– 6.94 (m, 7H), 6.88 (d,  $J = 8.0$  Hz, 2H), 6.62 (d,  $J = 8.0$  Hz, 2H), 5.34 (d,  $J = 2.0$  Hz, 1H), 4.45 (d,  $J = 11.2$  Hz, 1H), 4.22 – 4.08 (m, 2H), 4.05 – 3.95 (m, 1H), 2.54 – 2.41 (m, 1H), 2.21 (dd,  $J = 14.0, 3.6$  Hz, 1H), 2.12 (s, 3H), 1.91 (s, 3H).

$^{13}\text{C}$  NMR (100 MHz,  $\text{CDCl}_3$ )  $\delta$  207.34, 203.79, 145.95, 139.09, 138.22, 136.30, 136.06, 135.57, 132.47, 131.54, 128.96, 128.68, 128.10, 127.79, 127.72, 127.59, 127.47, 126.90, 124.81, 75.37, 57.03, 56.98, 47.60, 46.04, 42.93, 20.83, 20.65.

HRMS: (ESI)  $[\text{M}+\text{Na}]^+$  calcd. for  $\text{C}_{40}\text{H}_{36}\text{O}_3\text{Na}$ , 587.2562 found, 587.2556;

IR (KBr):  $\nu_{\text{max}}$  3417 (OH), 1666 (C=O), 1643 (C=O), 1597, 1342, 1210, 694, 540  $\text{cm}^{-1}$

mp 270.7-271.9  $^\circ\text{C}$

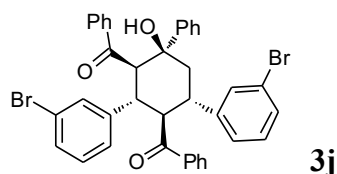

**(2,6-bis(3-bromophenyl)-4-hydroxy-4-phenylcyclohexane-1,3-diyl)bis(phenylmethanone)**

$^1\text{H}$  NMR (400 MHz,  $\text{CDCl}_3$ )  $\delta$  7.59 – 7.51 (m, 2H), 7.47 (t,  $J = 1.6$  Hz, 1H), 7.40 – 6.96 (m, 17H), 6.93 (t,  $J = 8.0$  Hz, 1H), 6.86 – 6.80 (m, 1H), 6.69 (t,  $J = 8.0$  Hz, 1H), 5.38 (d,  $J = 2.4$  Hz, 1H), 4.45 (d,  $J = 11.2$  Hz, 1H), 4.22 – 4.07 (m, 2H), 4.05 – 3.95 (m, 1H), 2.50 – 2.36 (m, 1H), 2.23 (dd,  $J = 14.0, 3.6$  Hz, 1H).

$^{13}\text{C}$  NMR (100 MHz,  $\text{CDCl}_3$ )  $\delta$  206.54, 202.52, 145.44, 144.21, 140.86, 138.44, 137.80, 133.06, 132.37, 130.64, 130.05, 129.99, 129.87, 129.74, 128.29, 127.85, 127.70, 127.39, 127.19, 127.07, 124.68, 122.43, 122.15, 75.20, 56.15, 55.96, 47.61, 45.82, 43.09.

HRMS: (ESI)  $[\text{M}+\text{Na}]^+$  calcd. for  $\text{C}_{38}\text{H}_{30}\text{O}_3\text{Br}_2\text{Na}$ , 715.0459 found, 715.0447;

IR (KBr):  $\nu_{\text{max}}$  3402 (OH), 1666 (C=O), 1643 (C=O), 1573, 1188, 1072, 902, 779, 694  $\text{cm}^{-1}$

mp 236.0-237.1  $^\circ\text{C}$

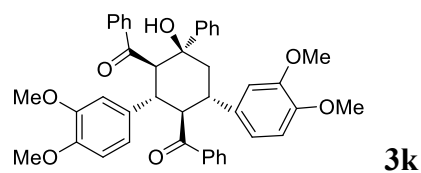

**(2,6-bis(3,4-dimethoxyphenyl)-4-hydroxy-4-phenylcyclohexane-1,3-diyl)bis(phenylmethanone)**

$^1\text{H}$  NMR (400 MHz,  $\text{CDCl}_3$ )  $\delta$  7.56 (d,  $J = 7.6$  Hz, 2H), 7.33 – 7.16 (m, 8H), 7.13 – 7.01 (m, 4H), 6.85 (dd,  $J = 8.0, 1.6$  Hz, 1H), 6.78 – 6.56 (m, 4H), 6.34 (d,  $J = 8.4$  Hz, 2H), 5.40 (d,  $J = 2.0$  Hz, 1H), 4.45 (d,  $J = 11.2$  Hz, 1H), 4.21 – 4.07 (m, 2H), 4.05 – 3.95 (m, 1H), 3.75 (s, 3H), 3.71 (s, 3H), 3.59 (s, 3H), 3.54 (s, 3H), 2.50 – 2.39 (m, 1H), 2.24 (dd,  $J = 14.0, 3.6$  Hz, 1H).

$^{13}\text{C}$  NMR (100 MHz,  $\text{CDCl}_3$ )  $\delta$  207.29, 203.64, 148.59, 148.31, 147.71, 147.62, 145.88, 139.05, 138.19, 134.81, 132.71, 131.92, 131.11, 128.18, 127.69, 127.66, 127.62, 127.34, 127.01,

124.77, 119.71, 111.86, 111.22, 110.90, 75.45, 56.91, 56.87, 55.86, 55.80, 55.78, 55.62, 47.79, 46.26, 43.06.

**HRMS:** (ESI)  $[M+Na]^+$  calcd. for  $C_{42}H_{40}O_7Na$ , 679.2672 found, 679.2667;

**IR (film):**  $\nu_{max}$  3441 (OH), 3024, 1672 (C=O), 1650 (C=O), 1516, 1257, 1141, 1026, 754  $cm^{-1}$

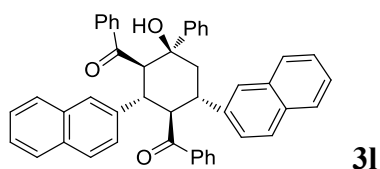

**(4-hydroxy-2,6-di(naphthalen-2-yl)-4-phenylcyclohexane-1,3-diyl)bis(phenylmethanone)**

**$^1H$  NMR** (400 MHz,  $CDCl_3$ )  $\delta$  7.80 – 7.15 (m, 22H), 7.13 – 7.01 (m, 2H), 6.99 – 6.86 (m, 3H), 6.80 (t,  $J = 8.0$  Hz, 2H), 5.46 (d,  $J = 2.4$  Hz, 1H), 4.67 (d,  $J = 11.2$  Hz, 1H), 4.54 – 4.37 (m, 2H), 4.35 – 4.25 (m, 1H), 2.75 – 2.55 (m, 1H), 2.35 (dd,  $J = 14.0, 3.6$  Hz, 1H).

**$^{13}C$  NMR** (100 MHz,  $CDCl_3$ )  $\delta$  207.13, 203.39, 145.83, 139.55, 138.68, 137.99, 135.99, 133.34, 132.88, 132.56, 132.32, 132.16, 131.66, 128.20, 128.04, 127.88, 127.60, 127.54, 127.38, 127.25, 127.12, 127.04, 126.94, 126.00, 125.78, 125.71, 125.42, 125.33, 124.83, 75.42, 56.79, 56.49, 48.21, 46.17, 43.53.

**HRMS:** (ESI)  $[M+Na]^+$  calcd. for  $C_{46}H_{36}O_3Na$ , 659.2562 found, 659.2576;

**IR (KBr):**  $\nu_{max}$  3410 (OH), 1668 (C=O), 1643 (C=O), 1597, 1342, 1256, 817, 694, 478  $cm^{-1}$

**mp** 283.5-284.1  $^{\circ}C$

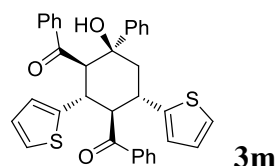

**(4-hydroxy-4-phenyl-2,6-di(thiophen-2-yl)cyclohexane-1,3-diyl)bis(phenylmethanone)**

**$^1H$  NMR** (400 MHz,  $CDCl_3$ )  $\delta$  7.52 (d,  $J = 7.6$  Hz, 2H), 7.45 (d,  $J = 7.2$  Hz, 2H), 7.36 (d,  $J = 7.6$  Hz, 2H), 7.31 – 7.24 (m, 2H), 7.20 – 7.01 (m, 7H), 6.93 (d,  $J = 5.2$  Hz, 1H), 6.74 (d,  $J = 3.2$  Hz, 1H), 6.69 – 6.60 (m, 3H), 6.38 (dd,  $J = 4.8, 3.6$  Hz, 1H), 5.28 (d,  $J = 2.4$  Hz, 1H), 4.55 (t,  $J = 11.2$  Hz, 1H), 4.47 – 4.33 (m, 2H), 4.13 (t,  $J = 11.2$  Hz, 1H), 2.53 – 2.43 (m, 1H), 2.39 (dd,  $J = 14.0, 4.0$  Hz, 1H).

**$^{13}C$  NMR** (100 MHz,  $CDCl_3$ )  $\delta$  206.65, 203.07, 145.46, 145.14, 142.02, 138.59, 137.79, 132.90, 132.14, 128.19, 127.88, 127.72, 127.68, 127.62, 127.11, 126.96, 126.53, 126.23, 125.52, 124.79, 123.88, 123.23, 75.20, 58.89, 57.67, 46.86, 43.30, 39.00.

**HRMS:** (ESI)  $[M+Na]^+$  calcd. for  $C_{34}H_{28}O_3NaS_2$ , 571.1378 found, 571.1375;



**IR (KBr):**  $\nu_{\max}$  3371 (OH), 1666 (C=O), 1635 (C=O), 1589, 1342, 1249, 694, 524  $\text{cm}^{-1}$   
**mp** 260.1-260.4  $^{\circ}\text{C}$

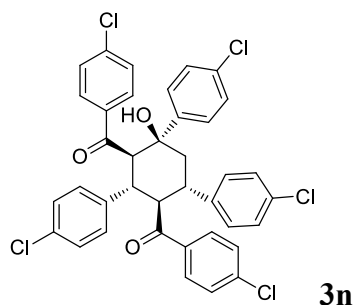

**(2,4,6-tris(4-chlorophenyl)-4-hydroxycyclohexane-1,3-diyl)bis((4-chlorophenyl)methanone)**

**$^1\text{H}$  NMR** (400 MHz,  $\text{CDCl}_3$ )  $\delta$  7.43 (d,  $J = 8.8$  Hz, 2H), 7.26 – 7.13 (m, 8H), 7.13 – 6.97 (m, 8H), 6.87 (d,  $J = 8.4$  Hz, 2H), 5.26 (d,  $J = 2.0$  Hz, 1H), 4.33 (d,  $J = 11.2$  Hz, 1H), 4.18 – 3.93 (m, 3H), 2.42 – 2.31 (m, 1H), 2.18 (dd,  $J = 14.0, 3.2$  Hz, 1H).

**$^{13}\text{C}$  NMR** (100 MHz,  $\text{CDCl}_3$ )  $\delta$  204.87, 201.34, 143.91, 140.15, 139.91, 139.08, 136.73, 136.46, 135.67, 133.24, 133.20, 132.80, 129.11, 129.03, 128.72, 128.55, 128.50, 128.49, 128.32, 126.13, 74.97, 56.19, 56.06, 47.28, 45.54, 42.67.

**HRMS:** (ESI)  $[\text{M}+\text{Na}]^+$  calcd. for  $\text{C}_{38}\text{H}_{27}\text{O}_3\text{NaCl}_5$ , 729.0301 found, 729.0262;

**IR (KBr):**  $\nu_{\max}$  3487 (OH), 1666 (C=O), 1635 (C=O), 1589, 1489, 1095, 825, 732, 532  $\text{cm}^{-1}$   
**mp** 259.6-261.2  $^{\circ}\text{C}$

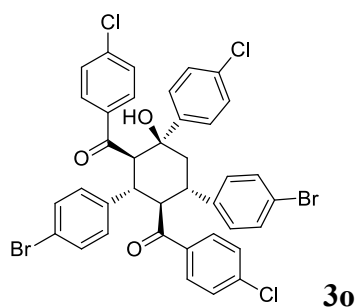

**(2,6-bis(4-bromophenyl)-4-(4-chlorophenyl)-4-hydroxycyclohexane-1,3-diyl)bis((4-chlorophenyl)methanone)**

**$^1\text{H}$  NMR** (400 MHz,  $\text{CDCl}_3$ )  $\delta$  7.43 (d,  $J = 8.8$  Hz, 2H), 7.26 – 7.14 (m, 8H), 7.12 – 7.06 (m, 6H), 7.04 – 6.93 (m, 4H), 5.25 (d,  $J = 2.4$  Hz, 1H), 4.32 (d,  $J = 11.2$  Hz, 1H), 4.17 – 3.91 (m, 3H), 2.41 – 2.29 (m, 1H), 2.18 (dd,  $J = 14.0, 3.6$  Hz, 1H).

**$^{13}\text{C}$  NMR** (100 MHz,  $\text{CDCl}_3$ )  $\delta$  204.85, 201.30, 143.87, 140.41, 140.15, 139.10, 137.23, 136.44, 135.67, 133.24, 131.66, 131.50, 129.46, 129.03, 128.72, 128.50, 128.48, 128.33, 126.12,

121.32, 120.87, 74.94, 56.06, 56.02, 47.33, 45.47, 42.73.

**HRMS:** (ESI)  $[M+H]^+$  calcd. for  $C_{38}H_{28}Br_2Cl_3O_3$ , 794.9471 found, 794.9457;

**IR (KBr):**  $\nu_{max}$  3441 (OH), 1666 (C=O), 1643 (C=O), 1589, 1489, 1087, 817, 532  $cm^{-1}$

**mp** 257.5-259.1  $^{\circ}C$

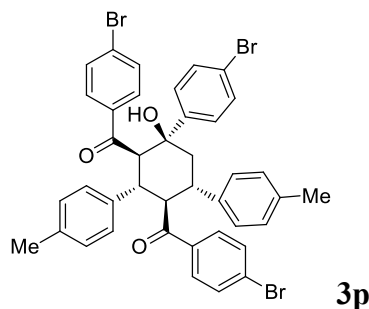

**(4-(4-bromophenyl)-4-hydroxy-2,6-di-p-tolylcyclohexane-1,3-diyl)bis((4-bromophenyl)methanone)**

**$^1H$  NMR** (400 MHz,  $CDCl_3$ )  $\delta$  7.38 (d,  $J = 8.8$  Hz, 2H), 7.30 (d,  $J = 8.8$  Hz, 2H), 7.25 – 7.07 (m, 10H), 6.97 (d,  $J = 7.2$  Hz, 2H), 6.90 (d,  $J = 7.6$  Hz, 2H), 6.67 (d,  $J = 8.0$  Hz, 2H), 5.30 (d,  $J = 2.4$  Hz, 1H), 4.37 – 4.27 (m, 1H), 4.13 – 4.02 (m, 2H), 3.99 – 3.89 (m, 1H), 2.41 – 2.31 (m, 1H), 2.20 – 2.10 (m, 4H), 1.97 (s, 3H).

**$^{13}C$  NMR** (100 MHz,  $CDCl_3$ )  $\delta$  205.86, 202.49, 145.02, 138.56, 137.52, 136.93, 136.52, 136.48, 135.14, 131.33, 131.18, 130.86, 129.18, 129.16, 128.97, 128.33, 127.64, 126.90, 126.59, 121.12, 75.17, 56.71, 56.50, 47.48, 45.83, 42.84, 20.86, 20.72.

**HRMS:** (ESI)  $[M+H]^+$  calcd. for  $C_{40}H_{34}Br_3O_3$ , 801.0038 found, 801.0092;

**IR (KBr):**  $\nu_{max}$  3448 (OH), 1666 (C=O), 1643 (C=O), 1581, 1396, 1072, 810  $cm^{-1}$

**mp** 282.2-282.8  $^{\circ}C$

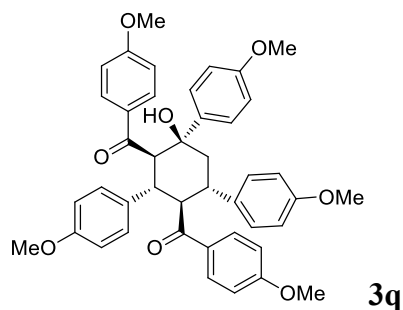

**(4-hydroxy-2,4,6-tris(4-methoxyphenyl)cyclohexane-1,3-diyl)bis((4-methoxyphenyl)methanone)**

**$^1H$  NMR** (400 MHz,  $CDCl_3$ )  $\delta$  7.44 (d,  $J = 8.8$  Hz, 2H), 7.35 (d,  $J = 9.2$  Hz, 4H), 7.17 (d,  $J = 8.8$  Hz, 2H), 7.05 (d,  $J = 7.2$  Hz, 2H), 6.69 (d,  $J = 8.8$  Hz, 2H), 6.62 (d,  $J = 8.8$  Hz, 2H), 6.54

(d,  $J = 8.8$  Hz, 4H), 6.37 (d,  $J = 8.8$  Hz, 2H), 5.52 (d,  $J = 2.0$  Hz, 1H), 4.40 – 4.30 (m, 1H), 4.18 – 4.03 (m, 2H), 4.03 – 3.90 (m, 1H), 3.70 (s, 3H), 3.69 (s, 3H), 3.65 (s, 3H), 3.62 (s, 3H), 3.47 (s, 3H), 2.46 – 2.33 (m, 1H), 2.16 (dd,  $J = 14.0, 3.6$  Hz, 1H).

$^{13}\text{C}$  NMR (100 MHz,  $\text{CDCl}_3$ )  $\delta$  205.17, 201.80, 163.19, 162.42, 158.21, 158.01, 157.95, 138.51, 134.61, 131.87, 131.20, 130.97, 130.36, 129.88, 128.80, 125.93, 113.65, 113.36, 112.95, 112.80, 75.06, 56.10, 55.24, 55.16, 55.09, 55.06, 54.91, 47.16, 46.55, 42.48.

HRMS: (ESI)  $[\text{M}+\text{Na}]^+$  calcd. for  $\text{C}_{43}\text{H}_{42}\text{O}_8\text{Na}$ , 709.2777 found, 709.2783;

IR (KBr):  $\nu_{\text{max}}$  3387 (OH), 1658 (C=O), 1604 (C=O), 1512, 1257, 1172, 1033, 833, 547  $\text{cm}^{-1}$

mp 147.8-248.8  $^\circ\text{C}$

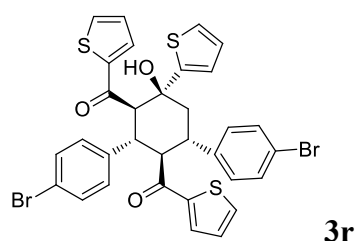

**(2,6-bis(4-bromophenyl)-4-hydroxy-4-(thiophen-2-yl)cyclohexane-1,3-diyl)bis(thiophen-2-ylmethanone)**

$^1\text{H}$  NMR (400 MHz,  $\text{CDCl}_3$ )  $\delta$  7.45 (d,  $J = 4.4$  Hz, 1H), 7.36 (d,  $J = 4.8$  Hz, 1H), 7.31 (d,  $J = 3.3$  Hz, 1H), 7.25 (d,  $J = 7.6$  Hz, 2H), 7.20 – 7.01 (m, 8H), 6.98 – 6.94 (m, 1H), 6.88 – 6.73 (m, 3H), 5.61 (s, 1H), 4.22 – 4.06 (m, 2H), 4.05 – 3.75 (m, 2H), 2.48 – 2.26 (m, 2H).

$^{13}\text{C}$  NMR (100 MHz,  $\text{CDCl}_3$ )  $\delta$  196.92, 193.60, 151.08, 144.43, 140.48, 137.45, 135.48, 134.03, 133.39, 131.72, 131.52, 131.39, 129.58, 127.77, 127.58, 126.82, 124.05, 122.98, 121.06, 120.70, 74.51, 59.48, 57.95, 47.16, 46.81, 42.44.

HRMS: (ESI)  $[\text{M}+\text{Na}]^+$  calcd. for  $\text{C}_{32}\text{H}_{24}\text{O}_3\text{NaS}_3\text{Br}_2$ , 732.9152 found, 732.9152;

IR (KBr):  $\nu_{\text{max}}$  3433 (OH), 1643 (C=O), 1604 (C=O), 1411, 1257, 1072, 817, 709, 532  $\text{cm}^{-1}$

mp 251.3-252.6  $^\circ\text{C}$

# VIII: $^1\text{H}$ NMR, $^{13}\text{C}$ NMR, $^{13}\text{C}$ DEPT-135 spectra of products

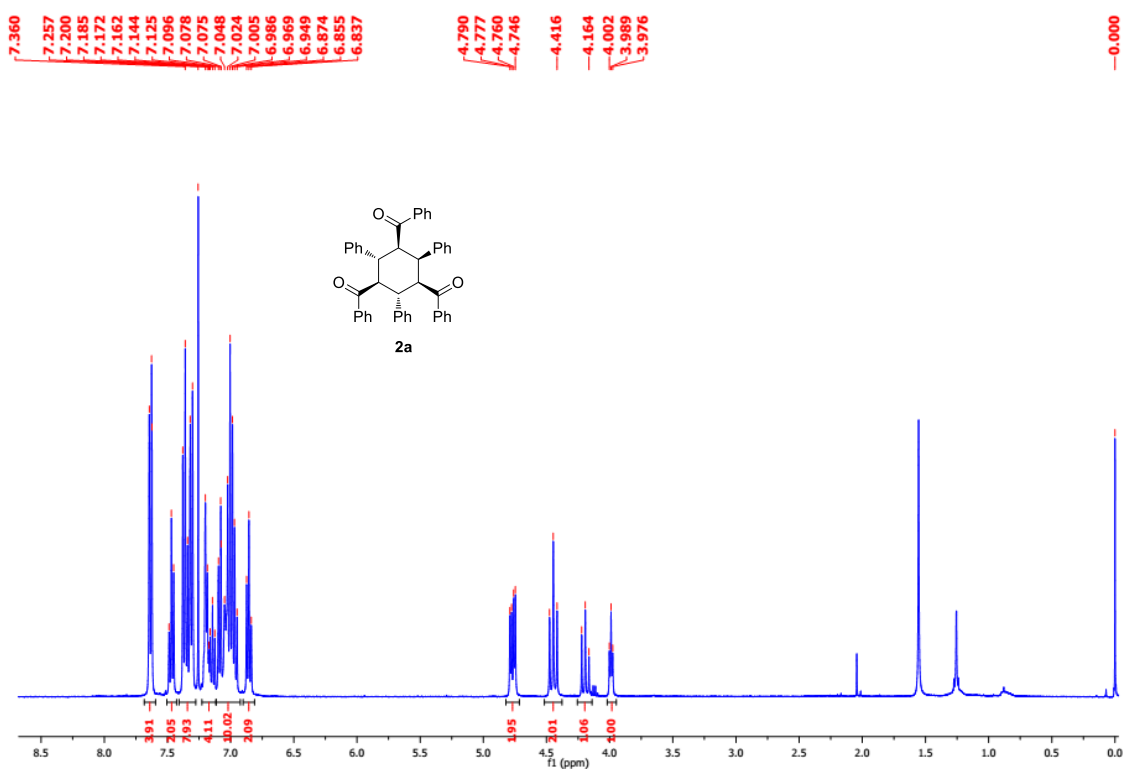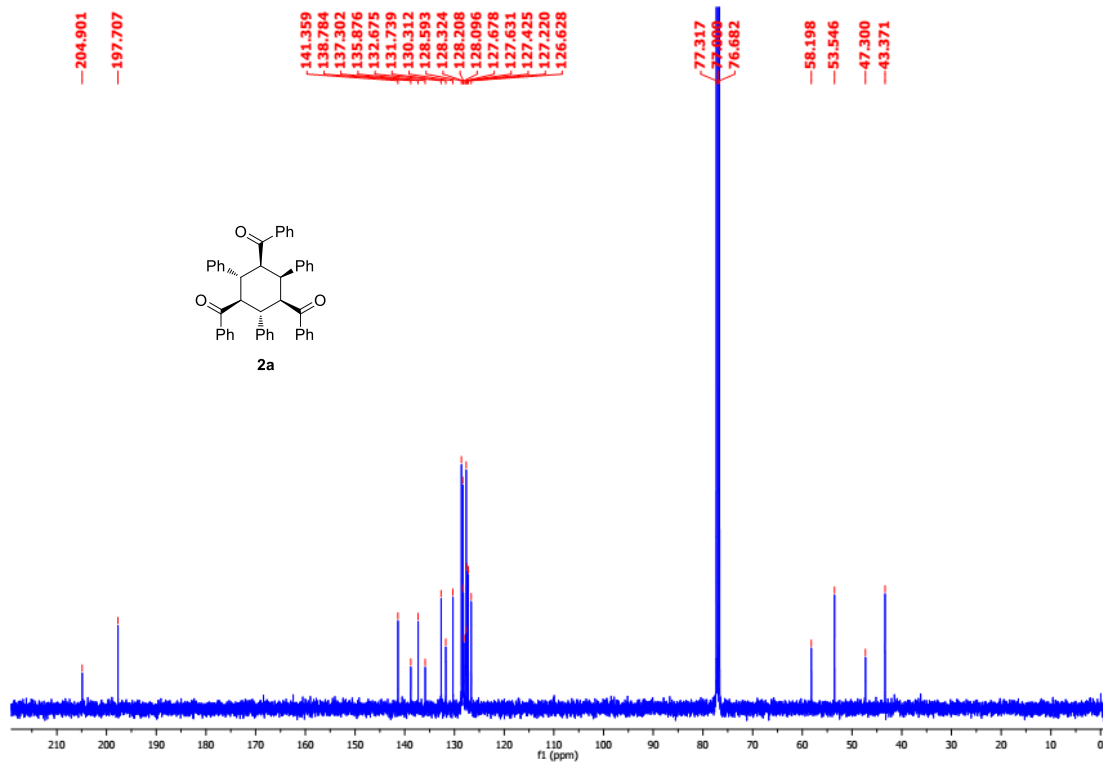

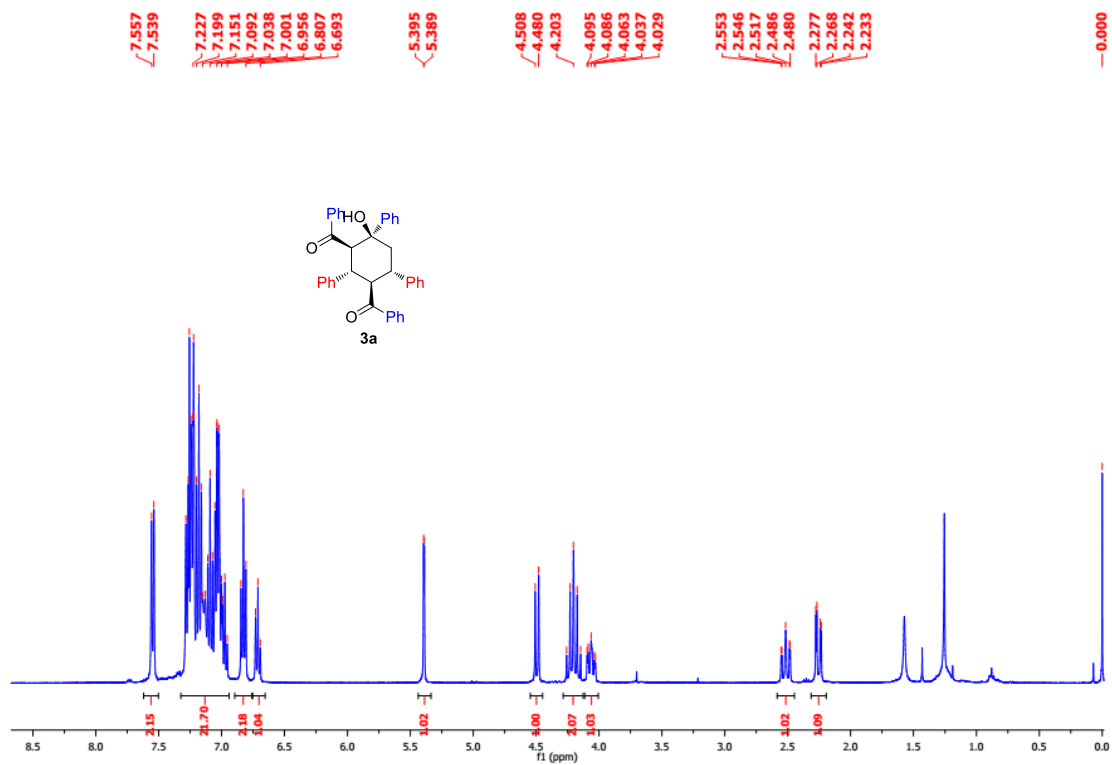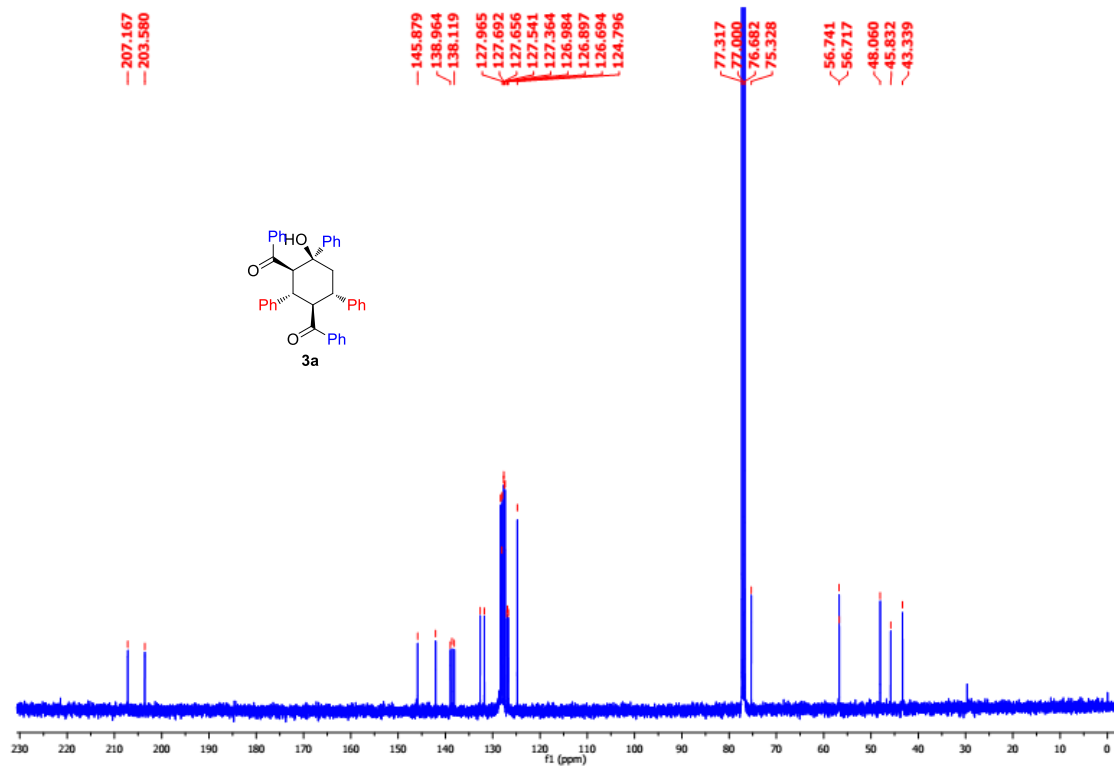

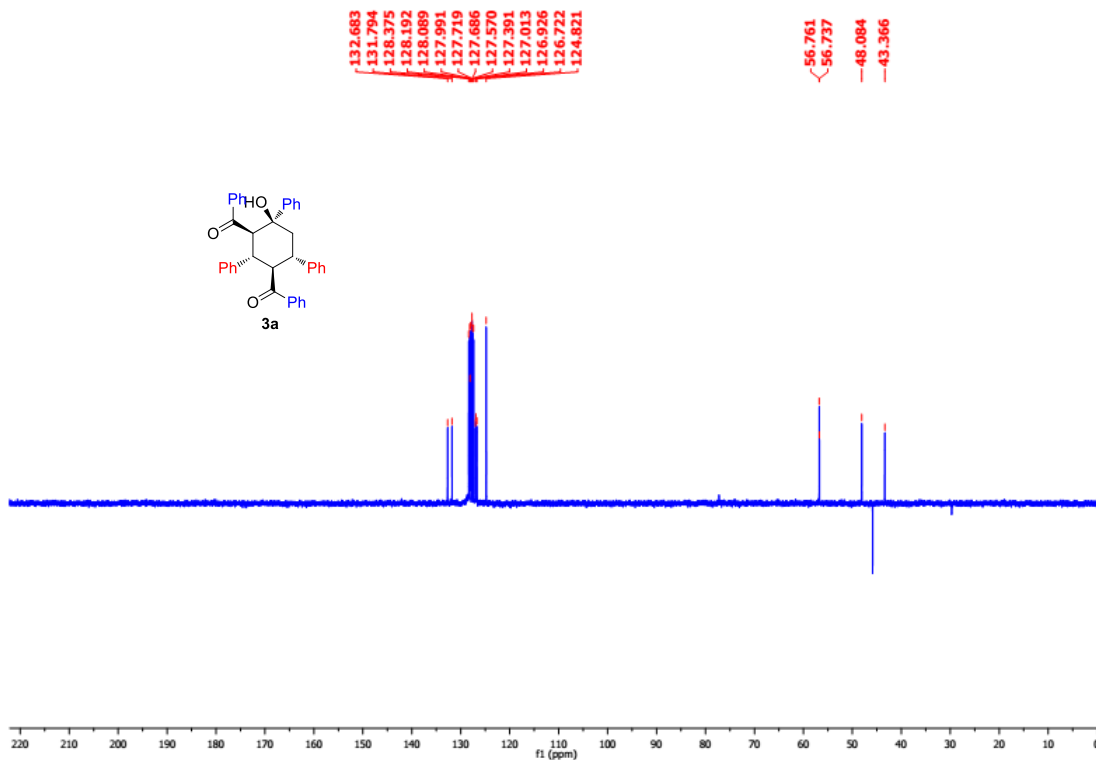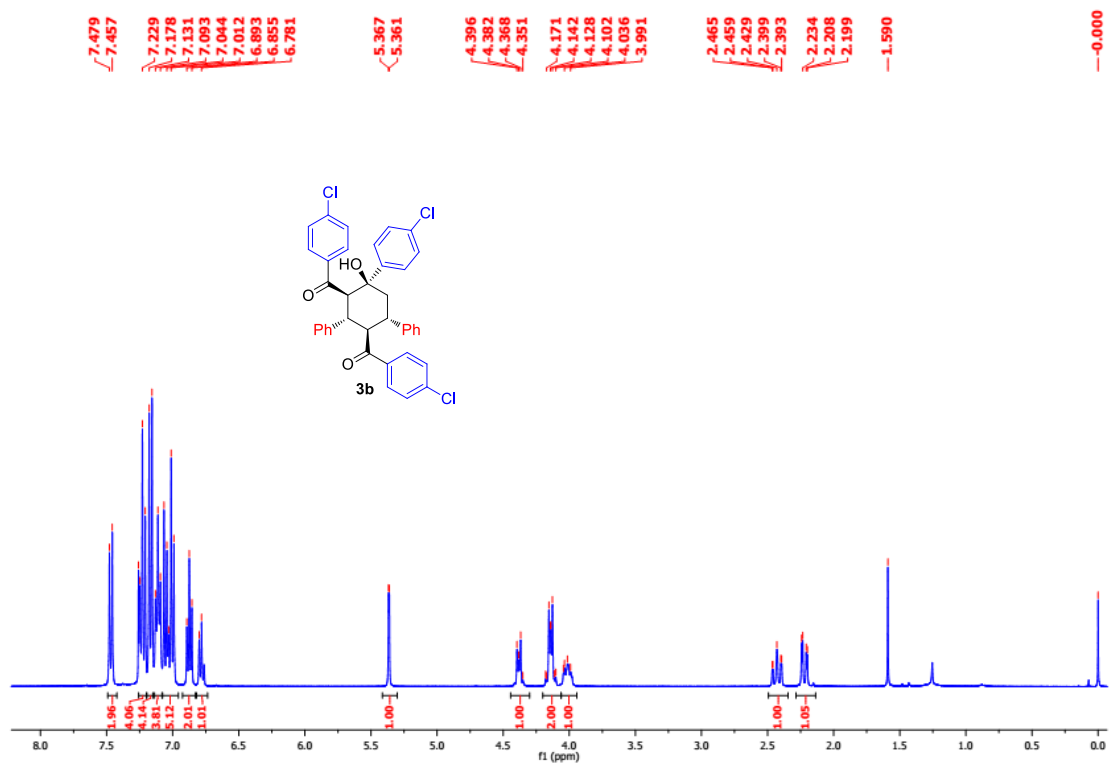

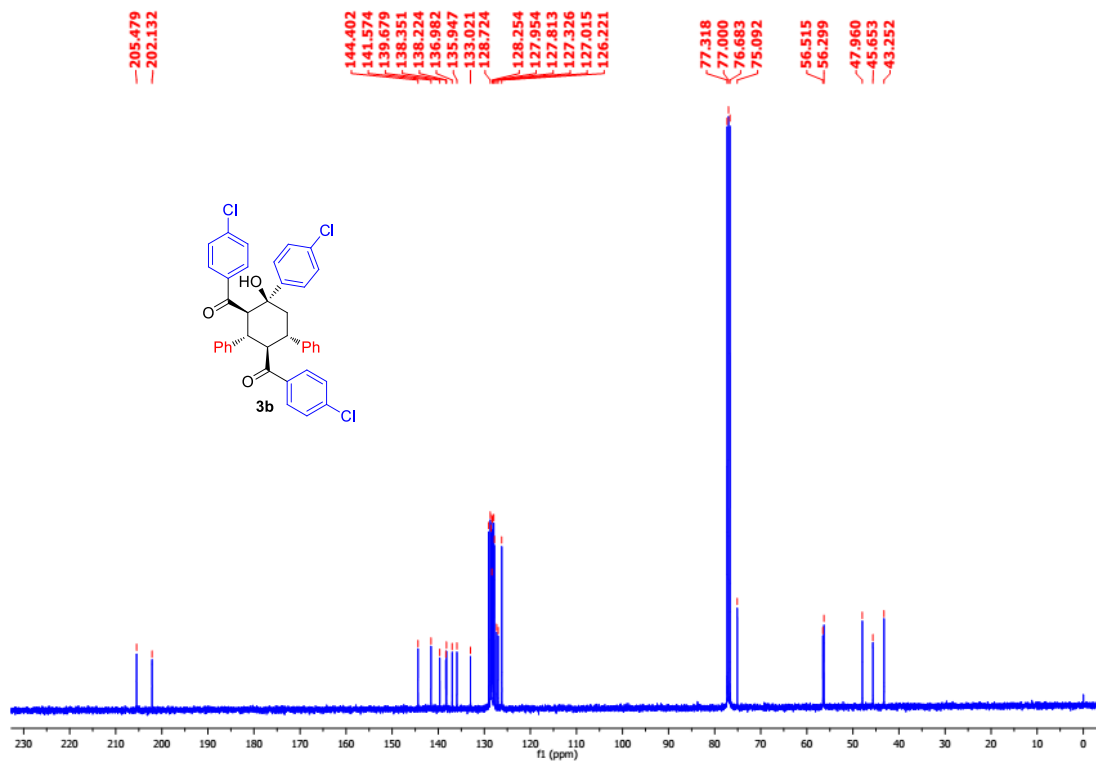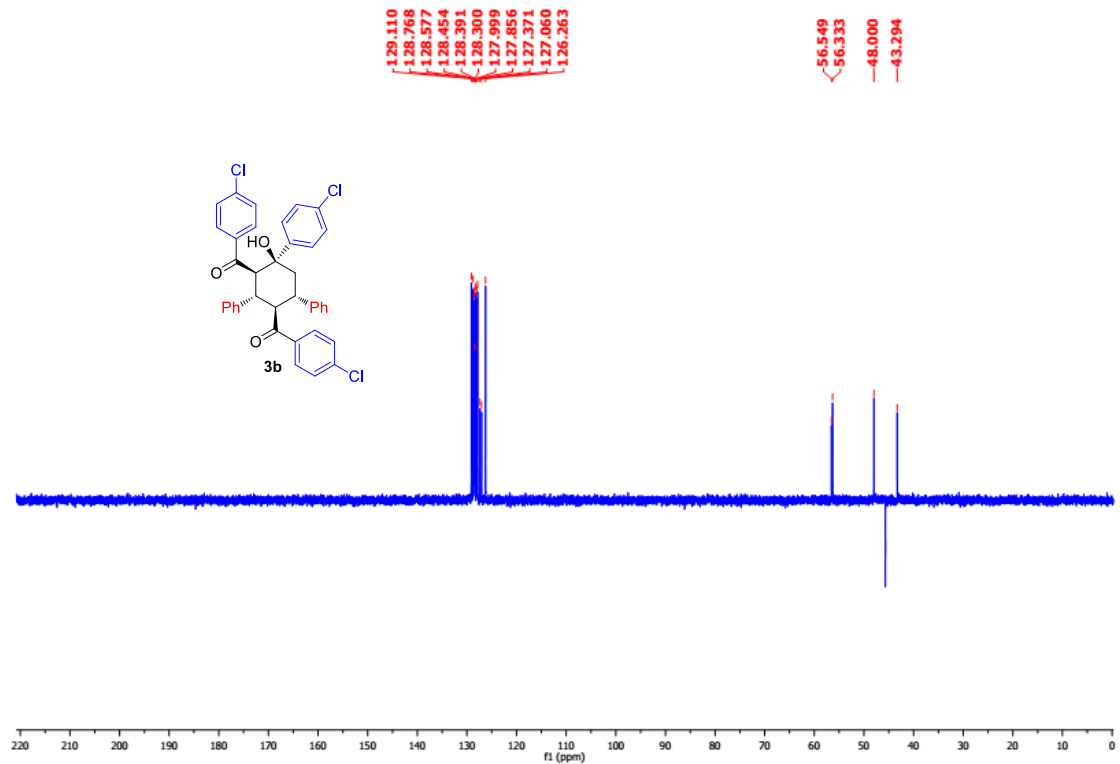

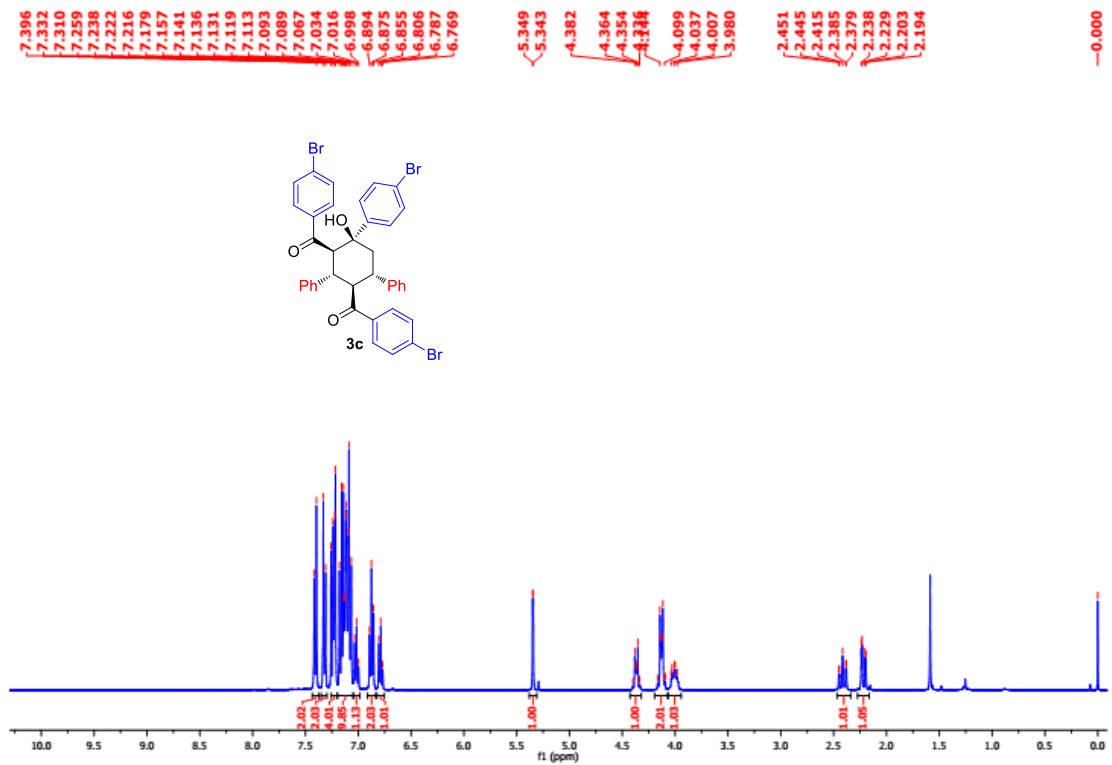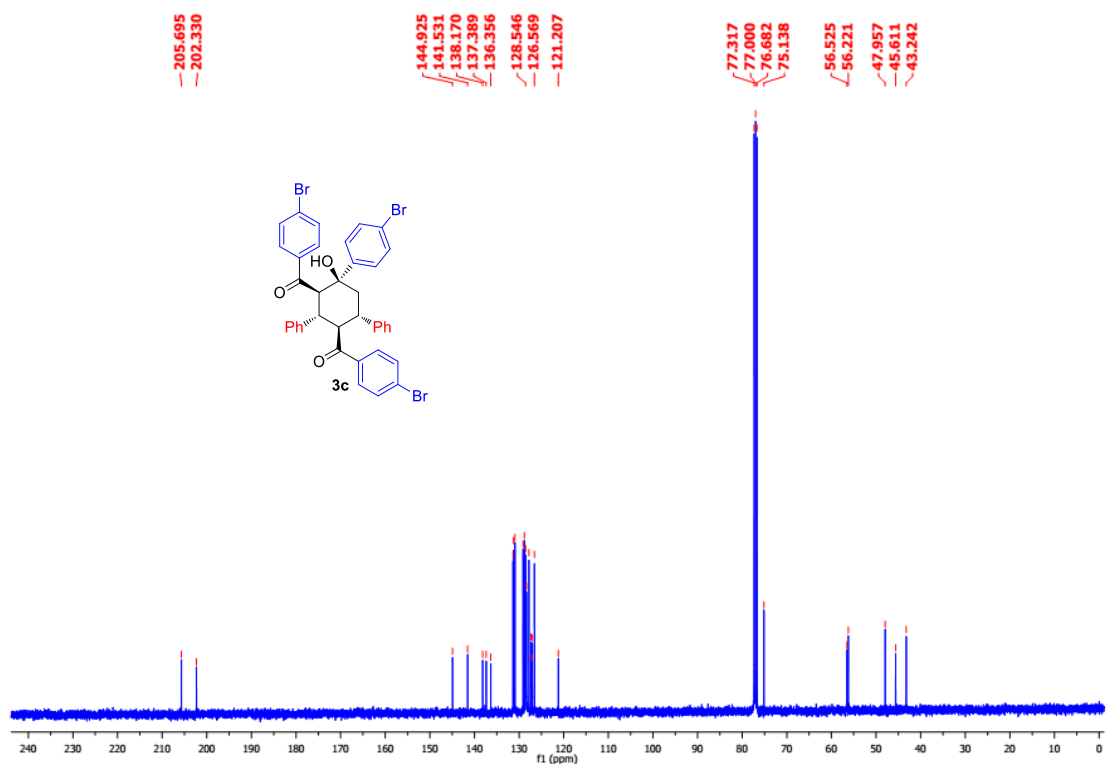



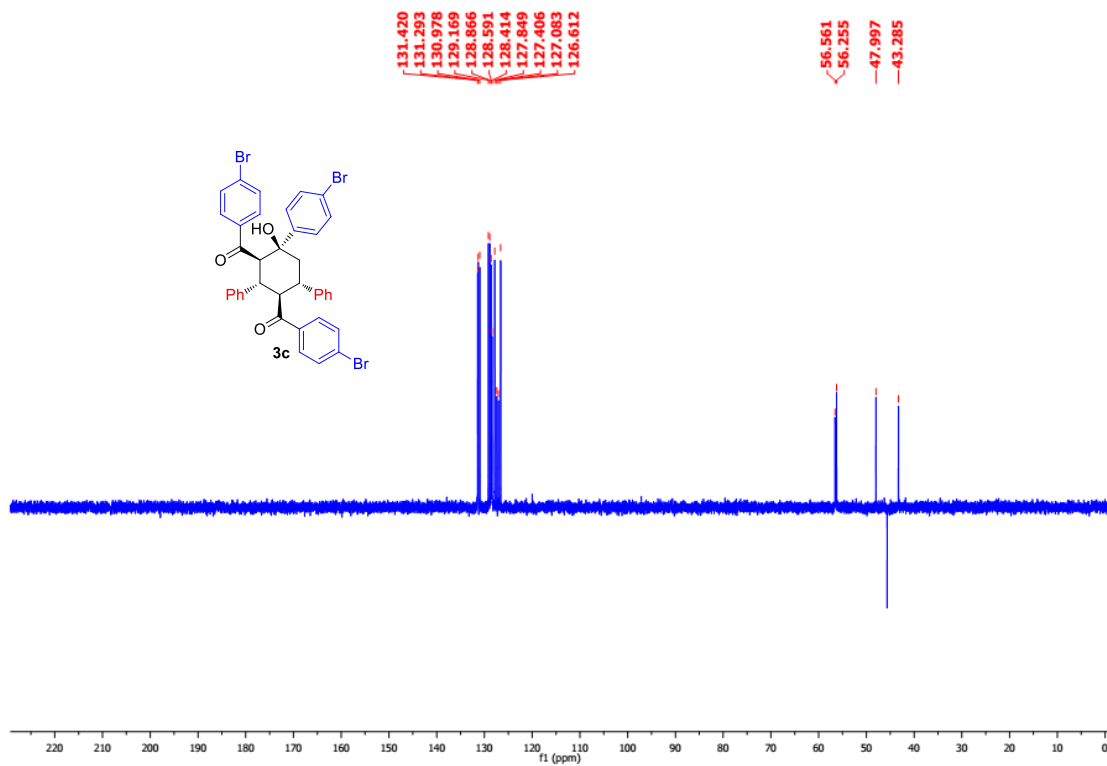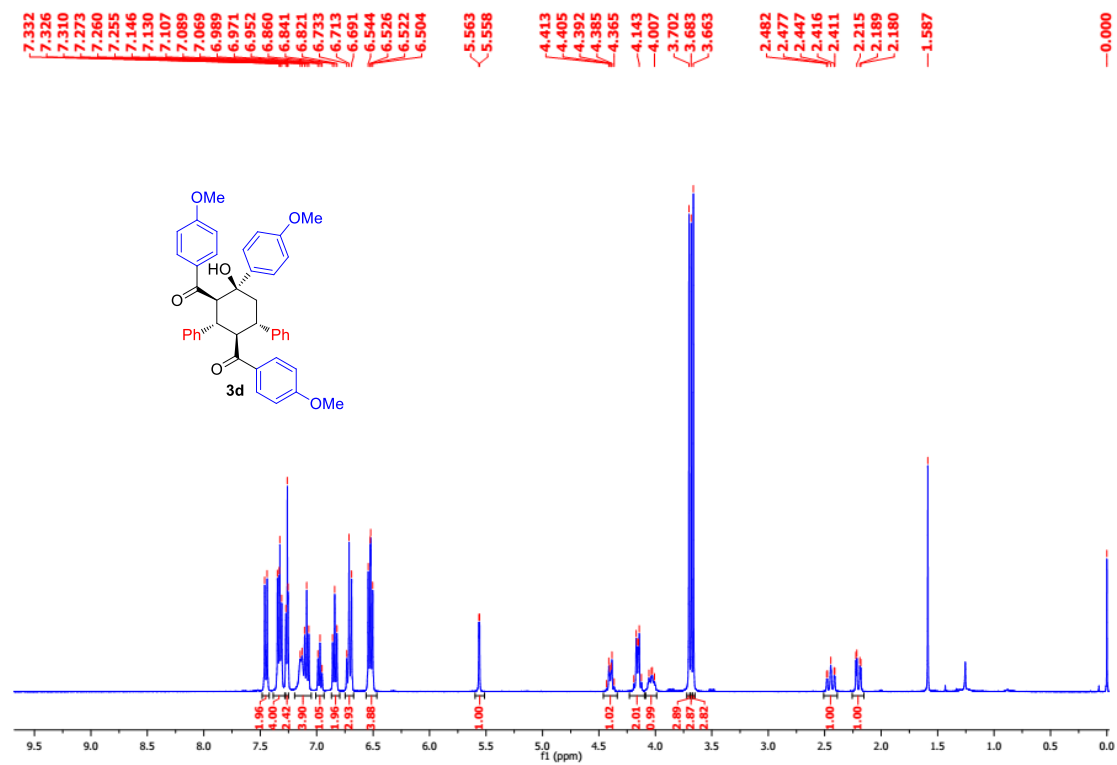

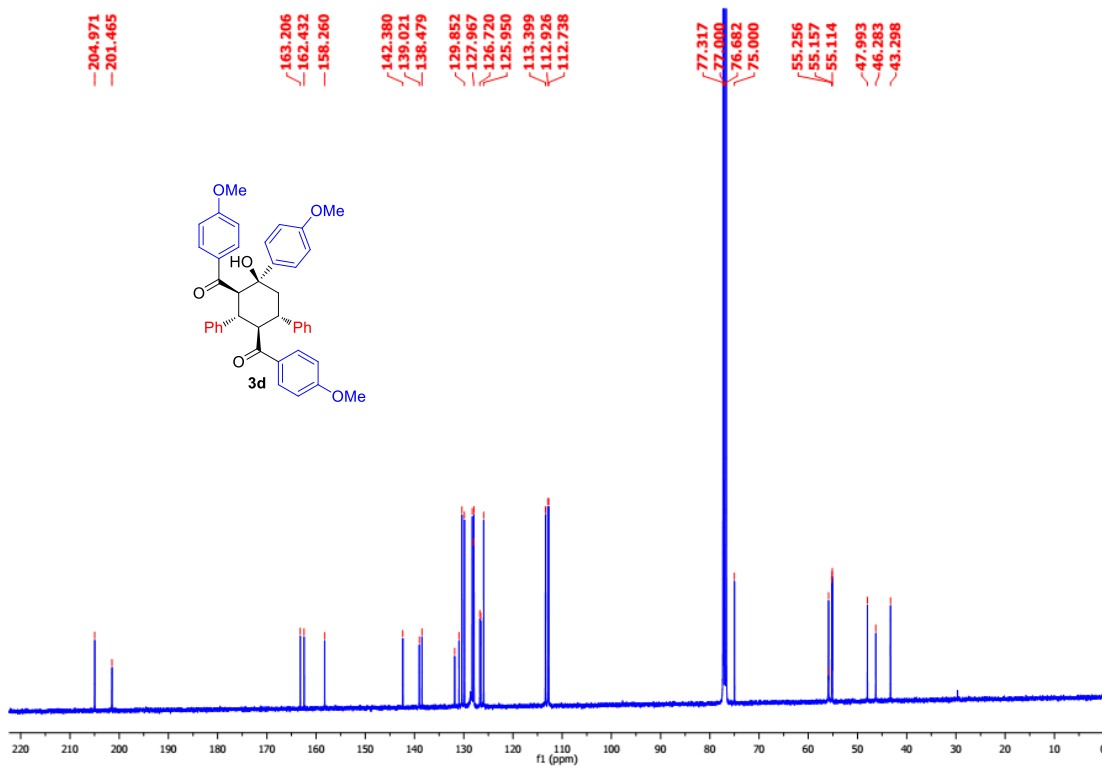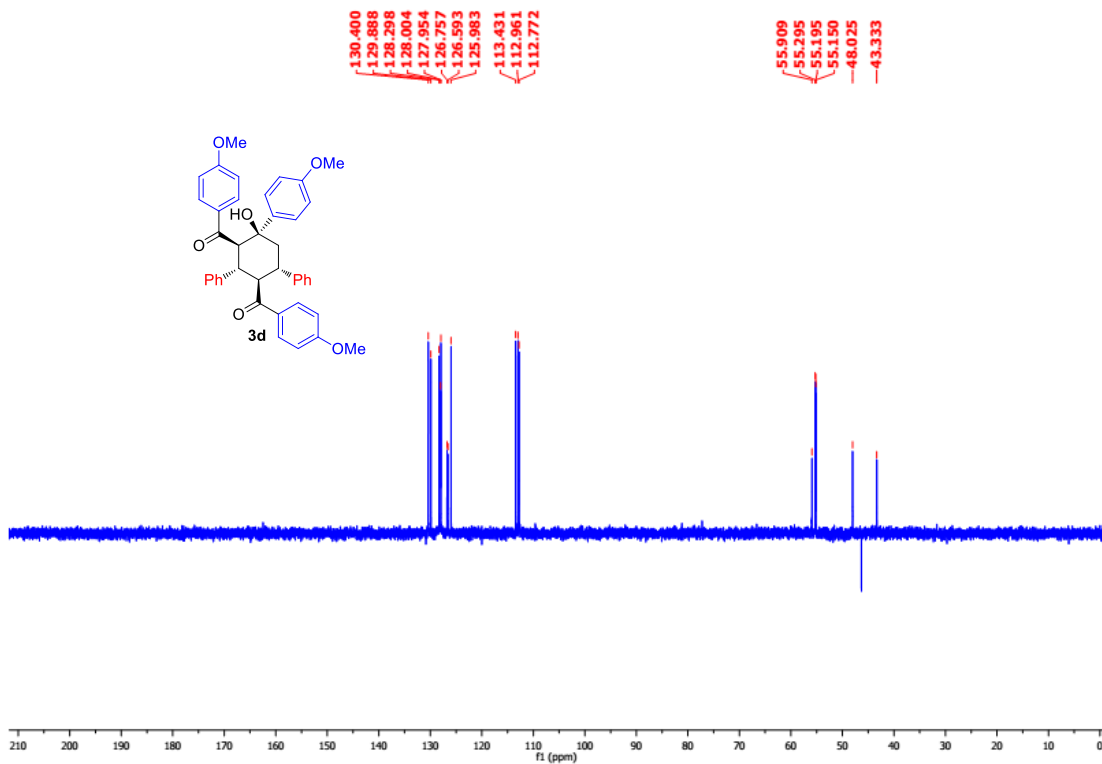

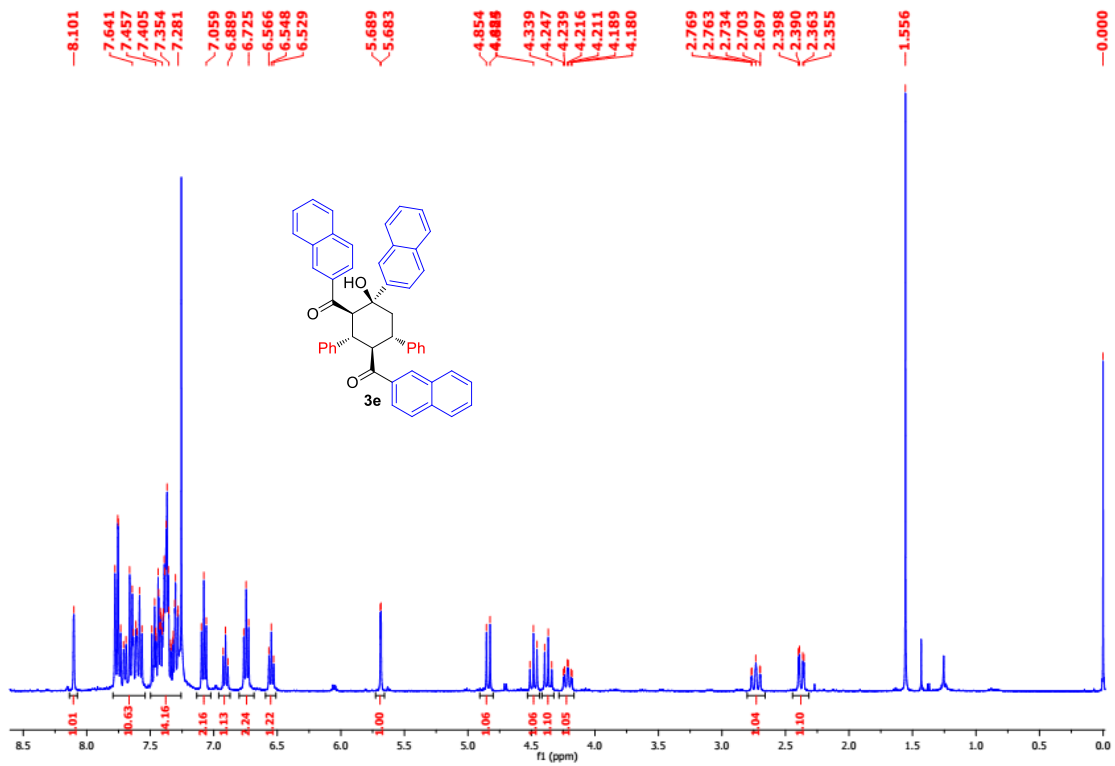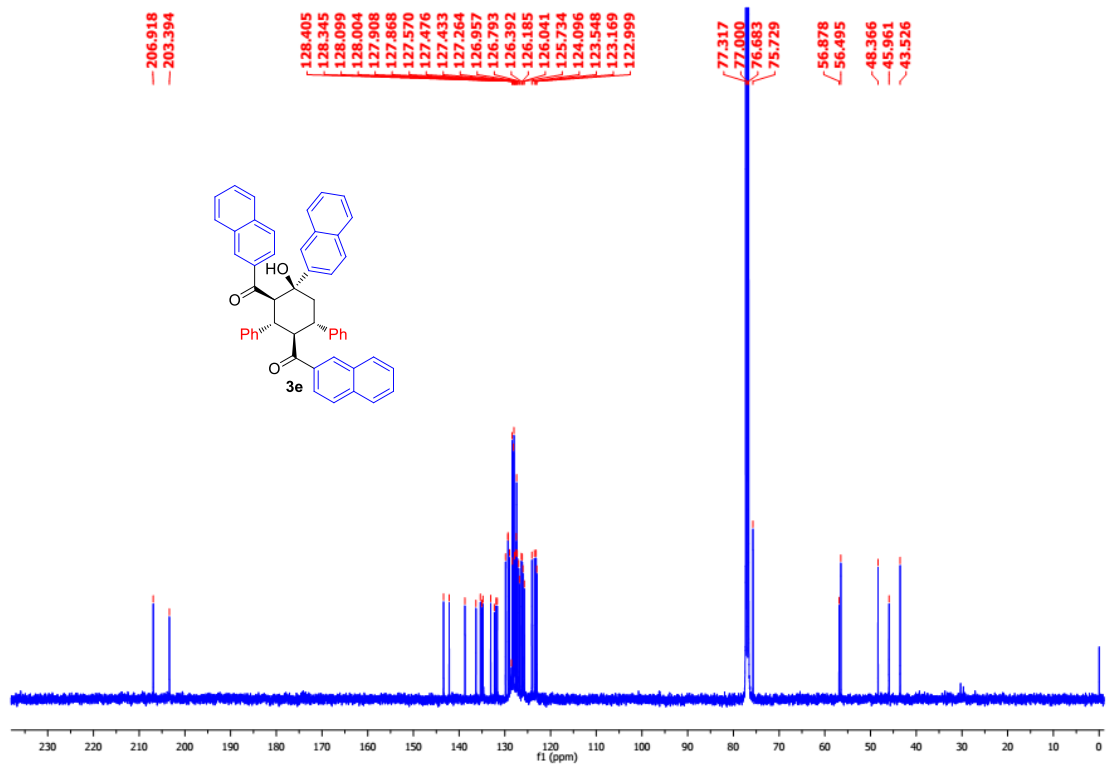

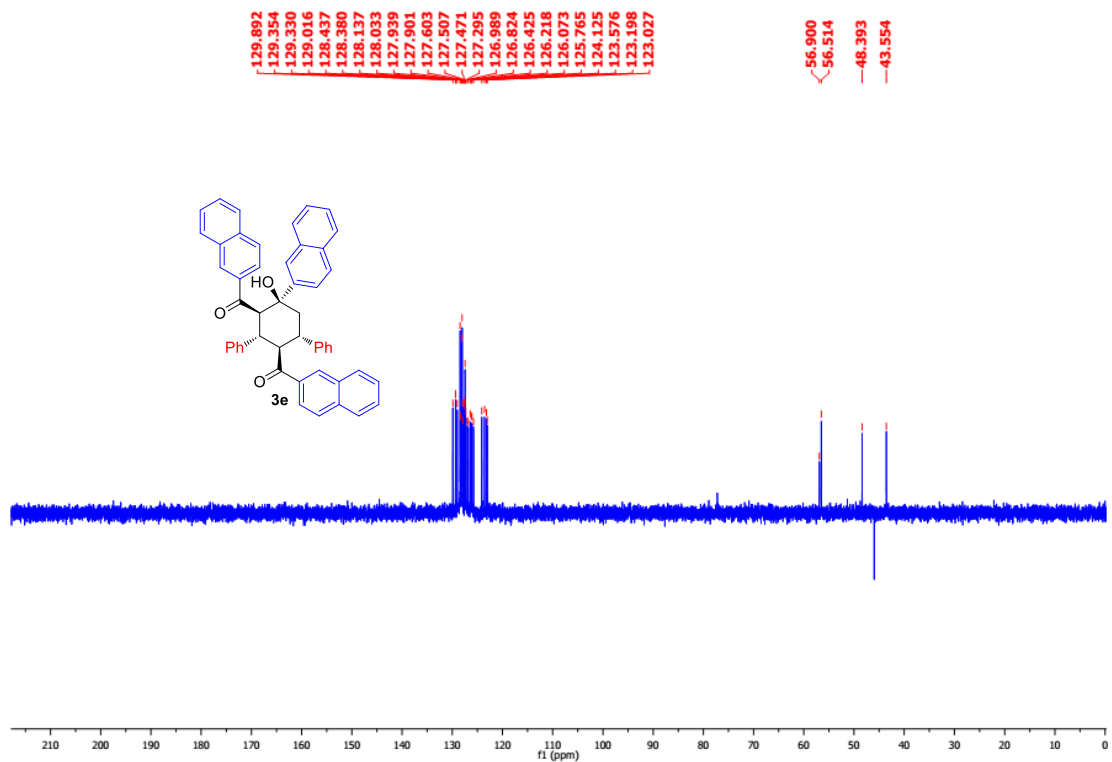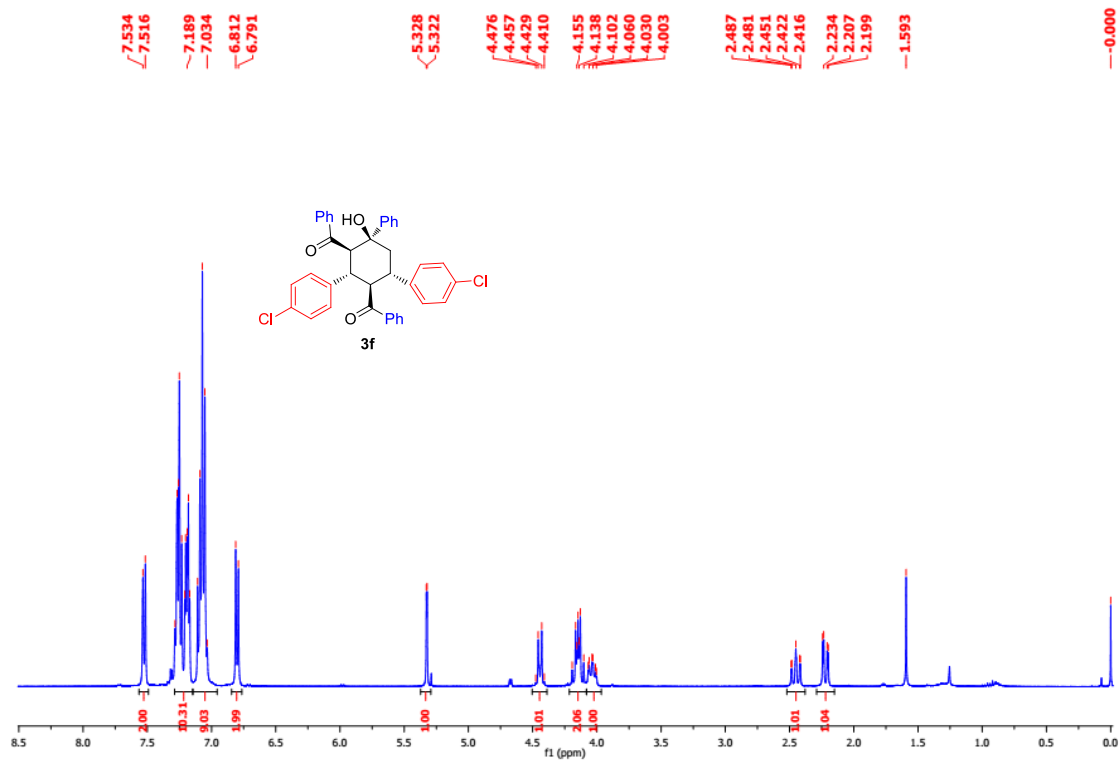

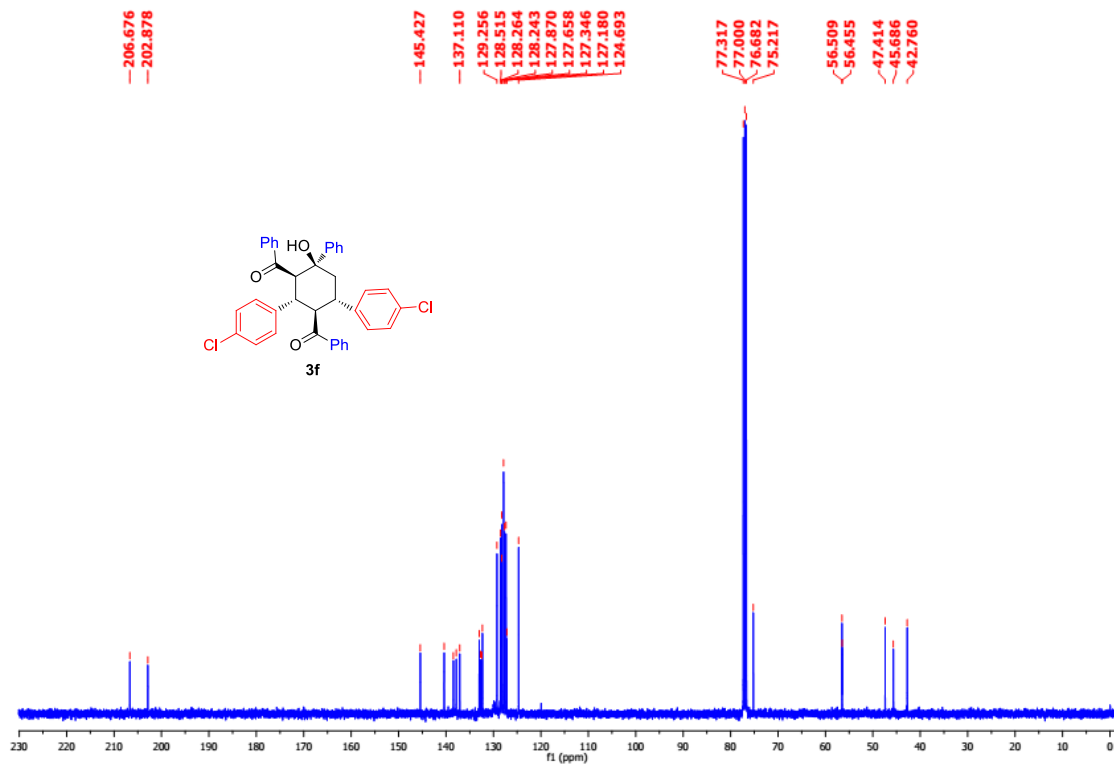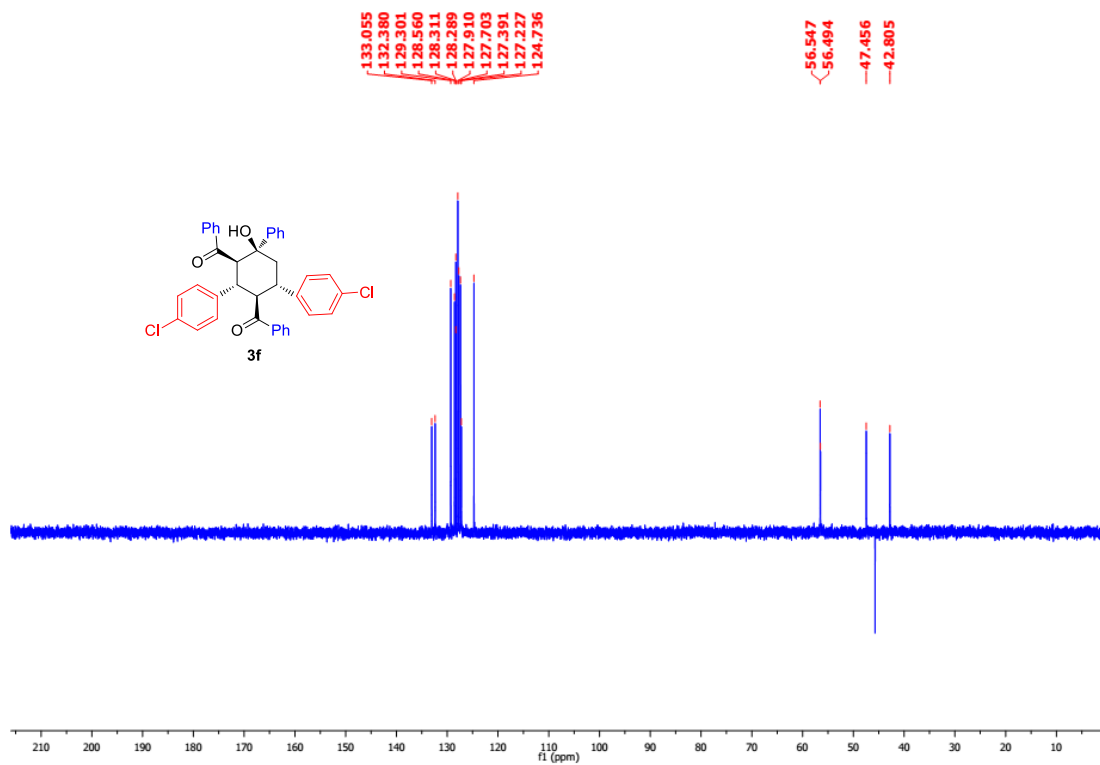

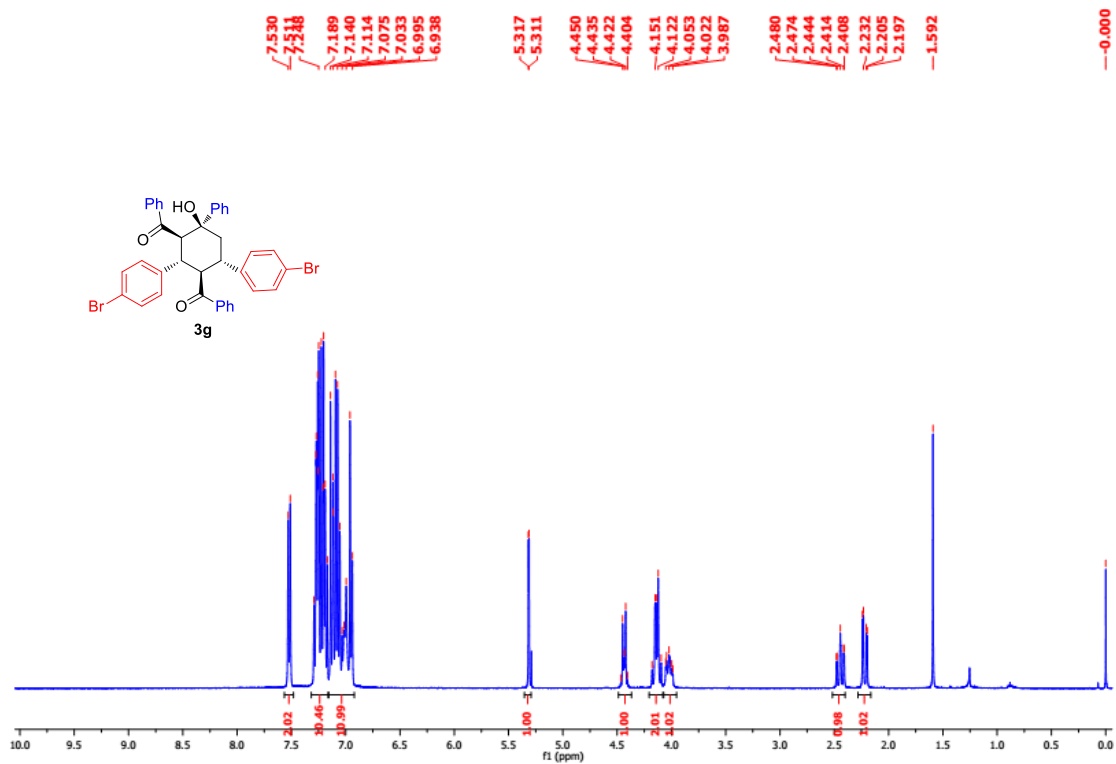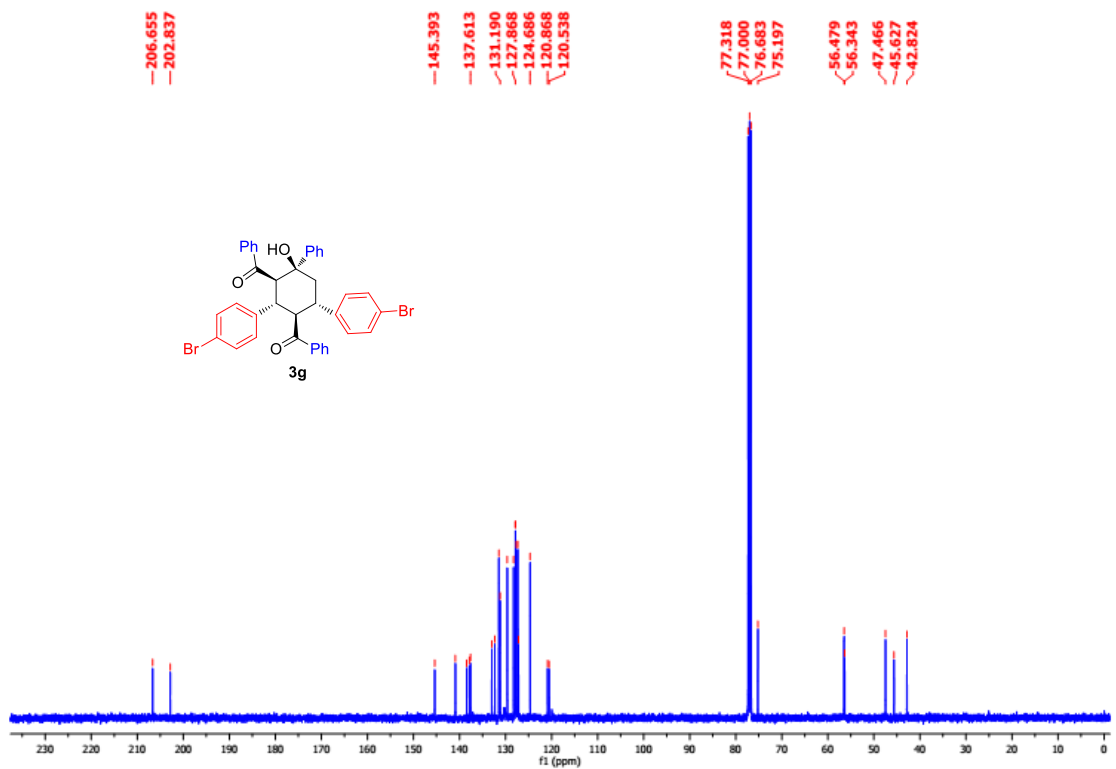

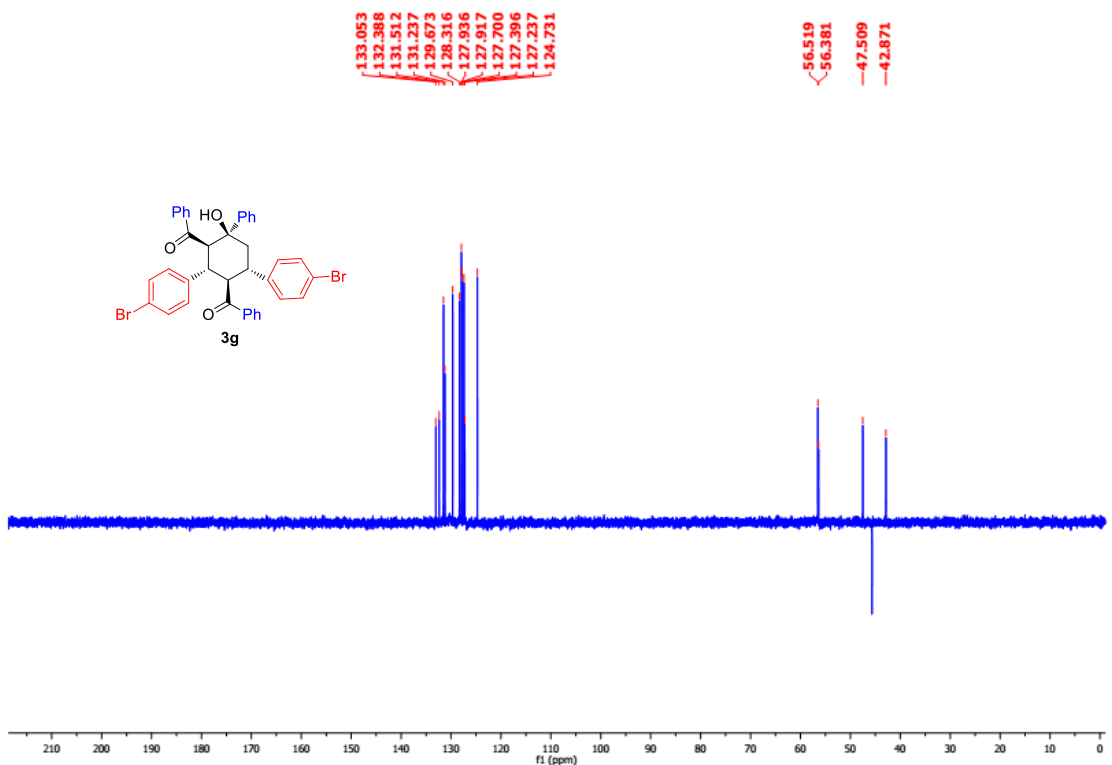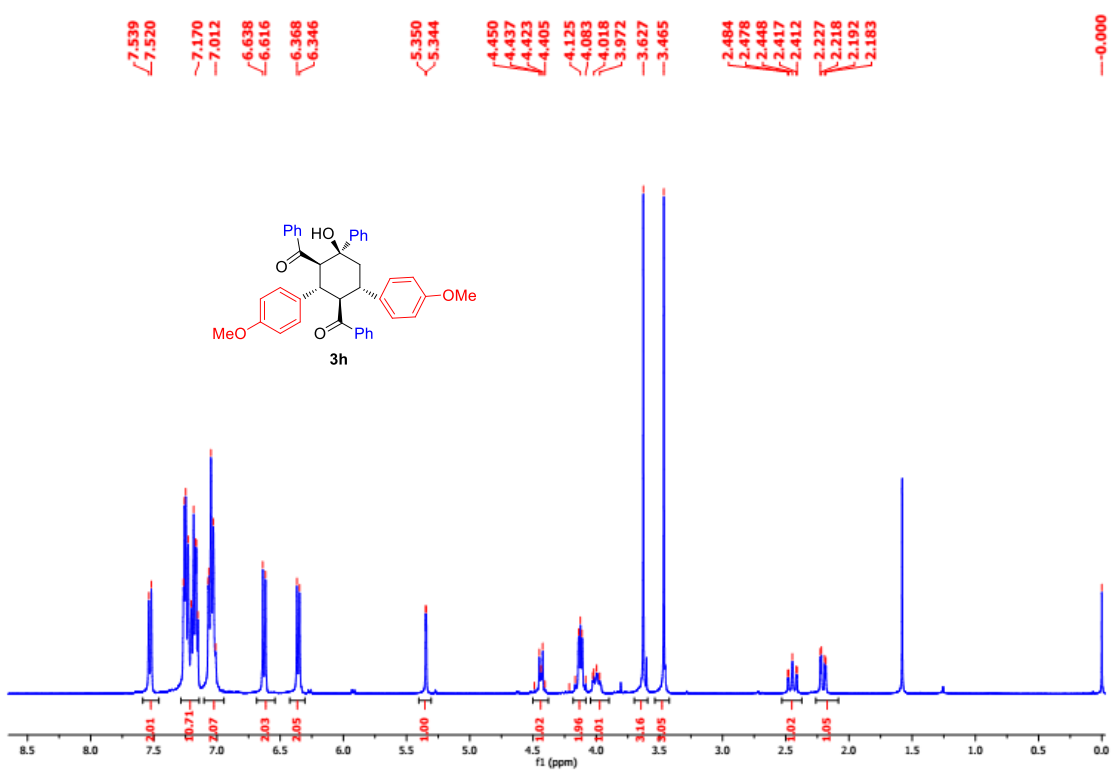

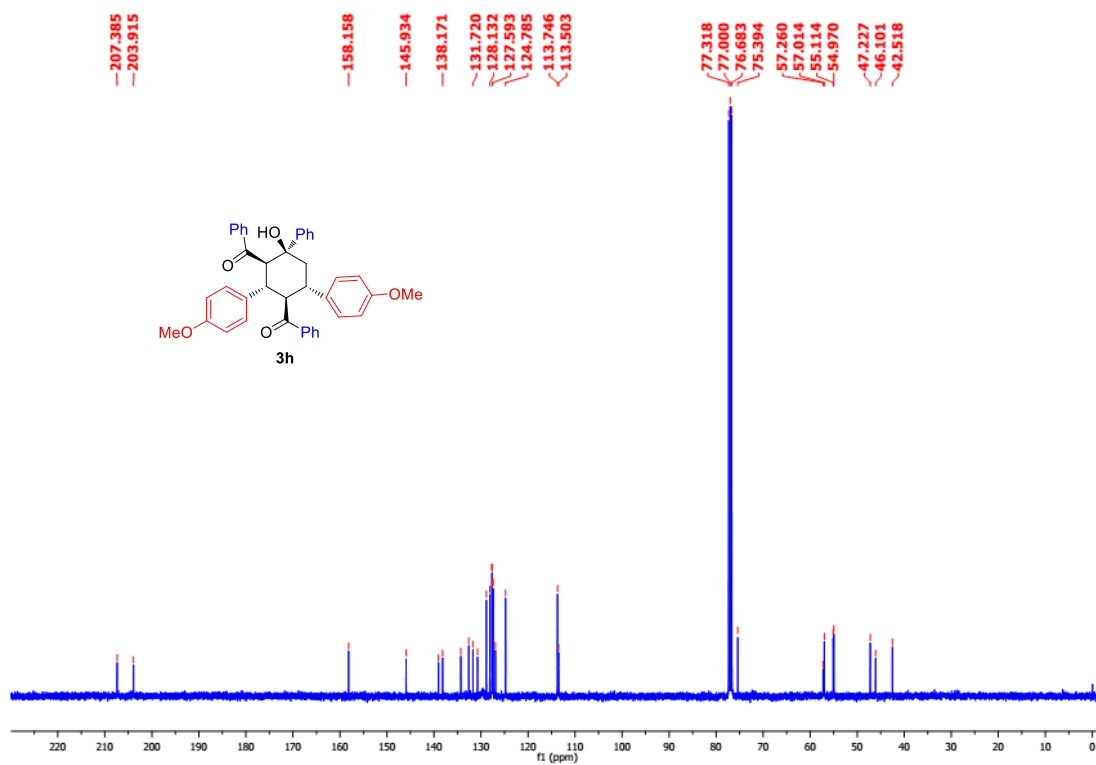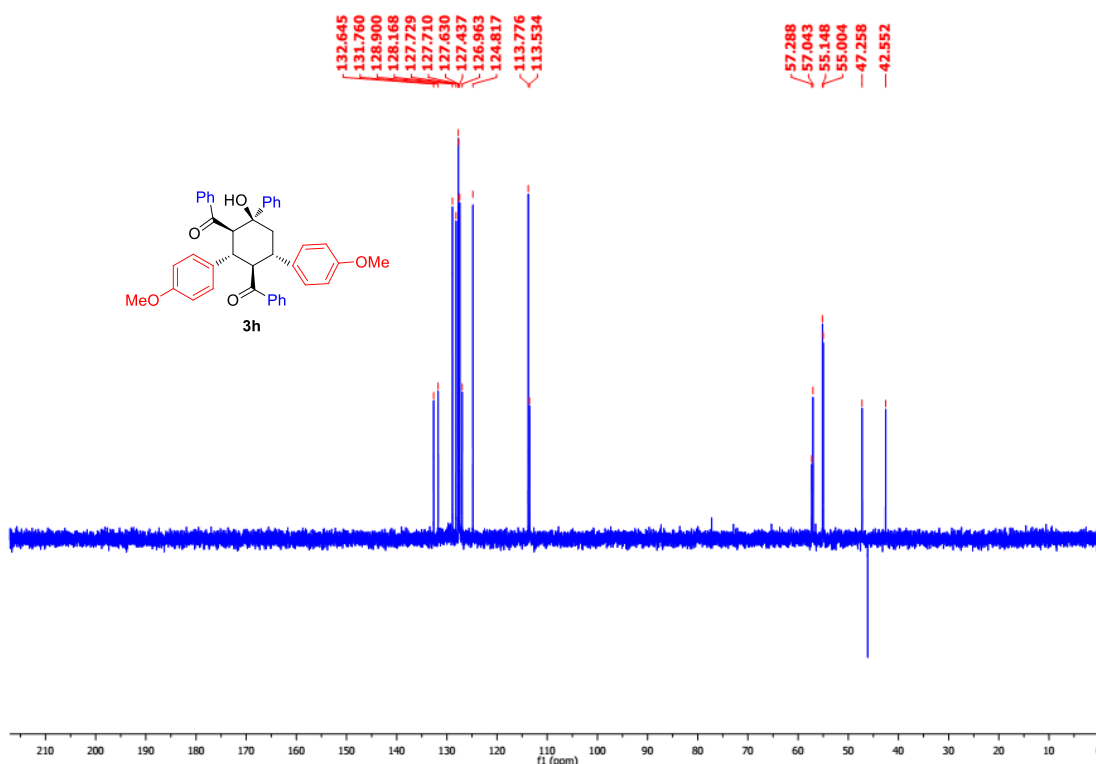



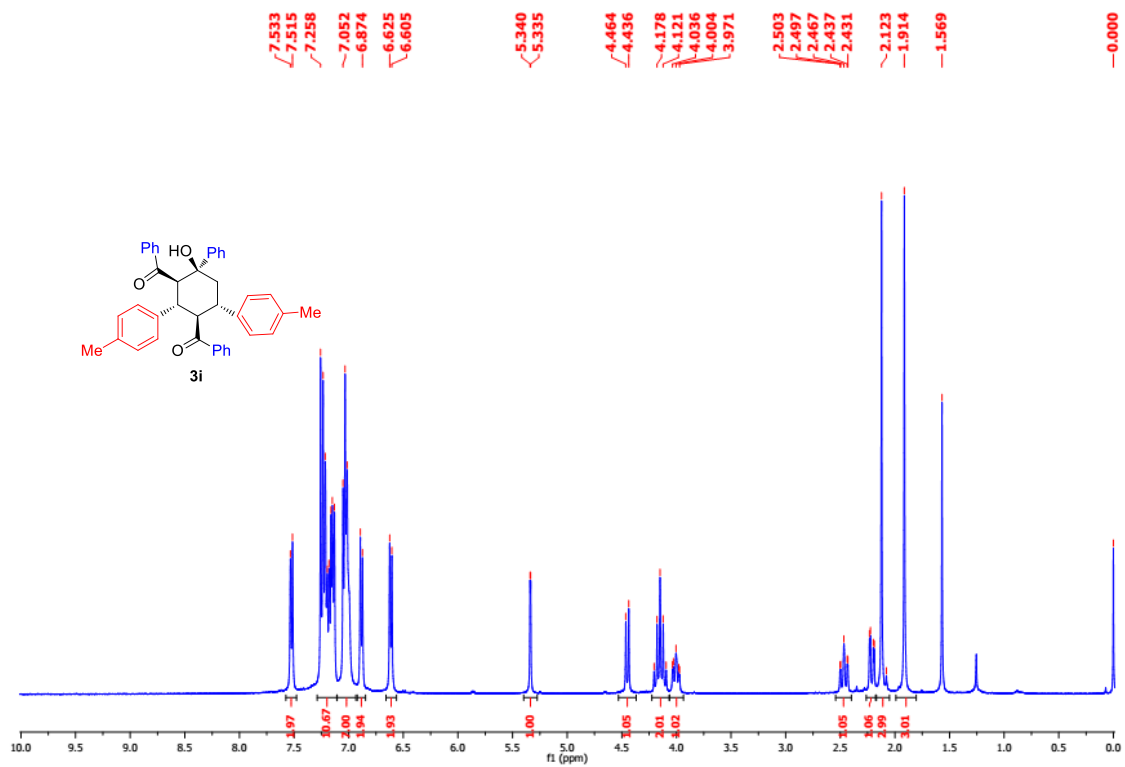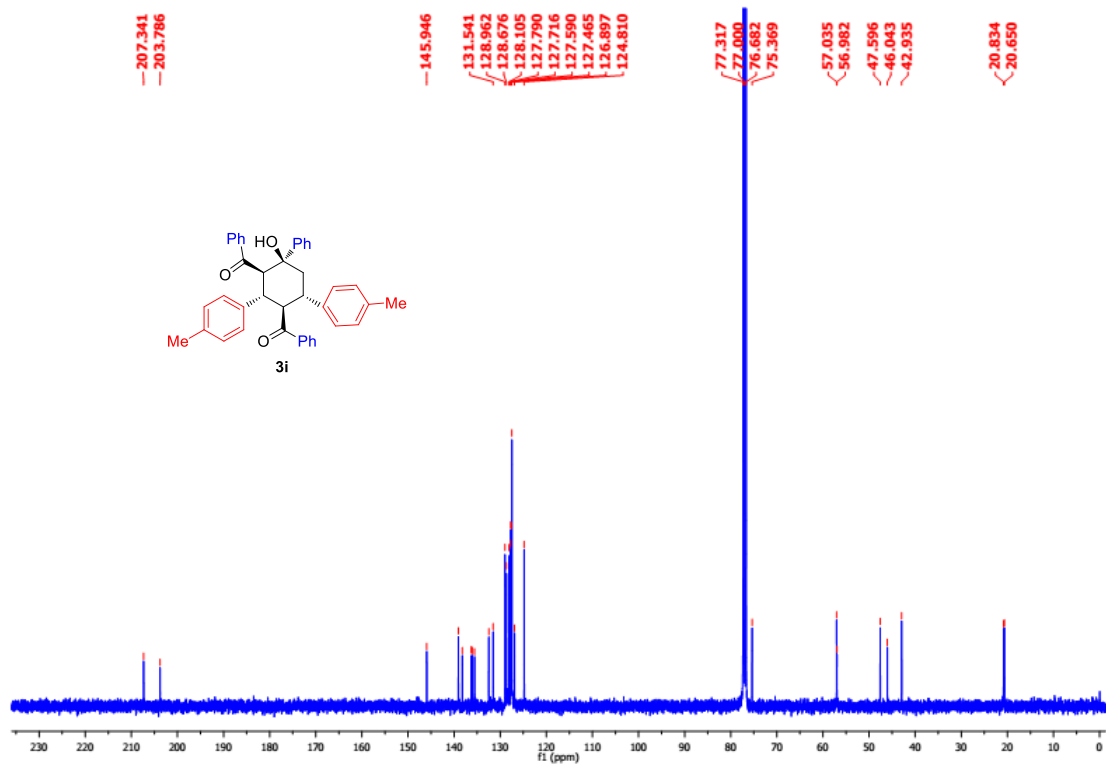

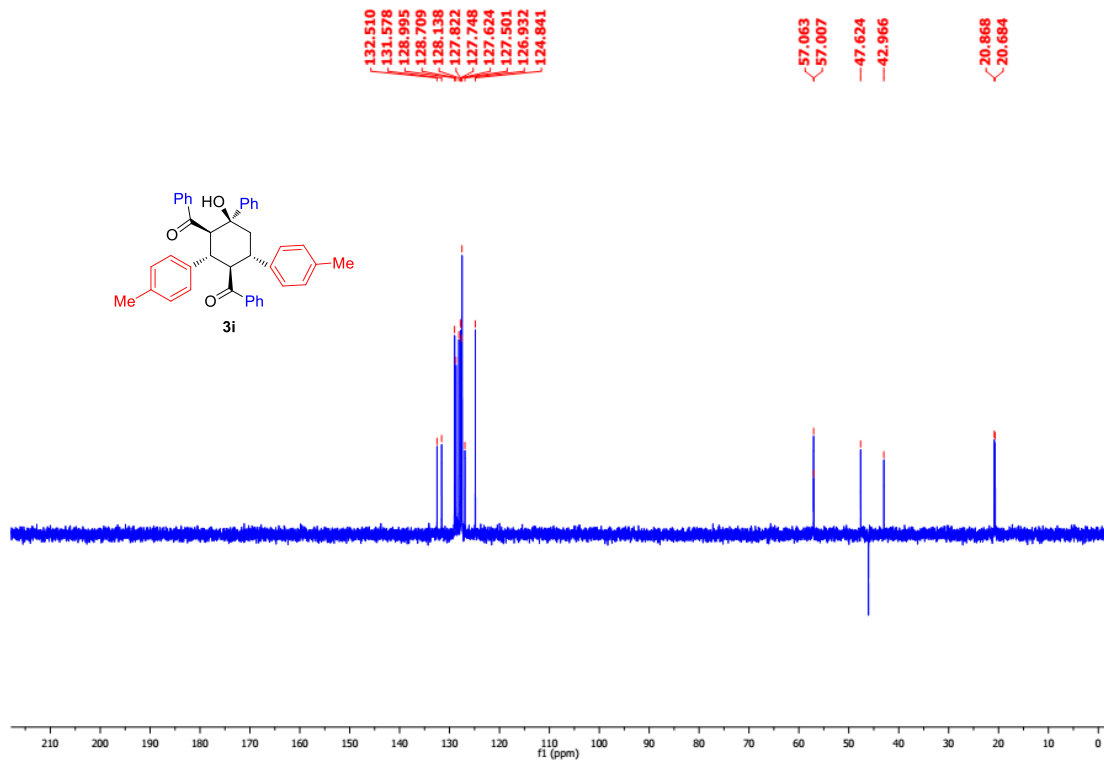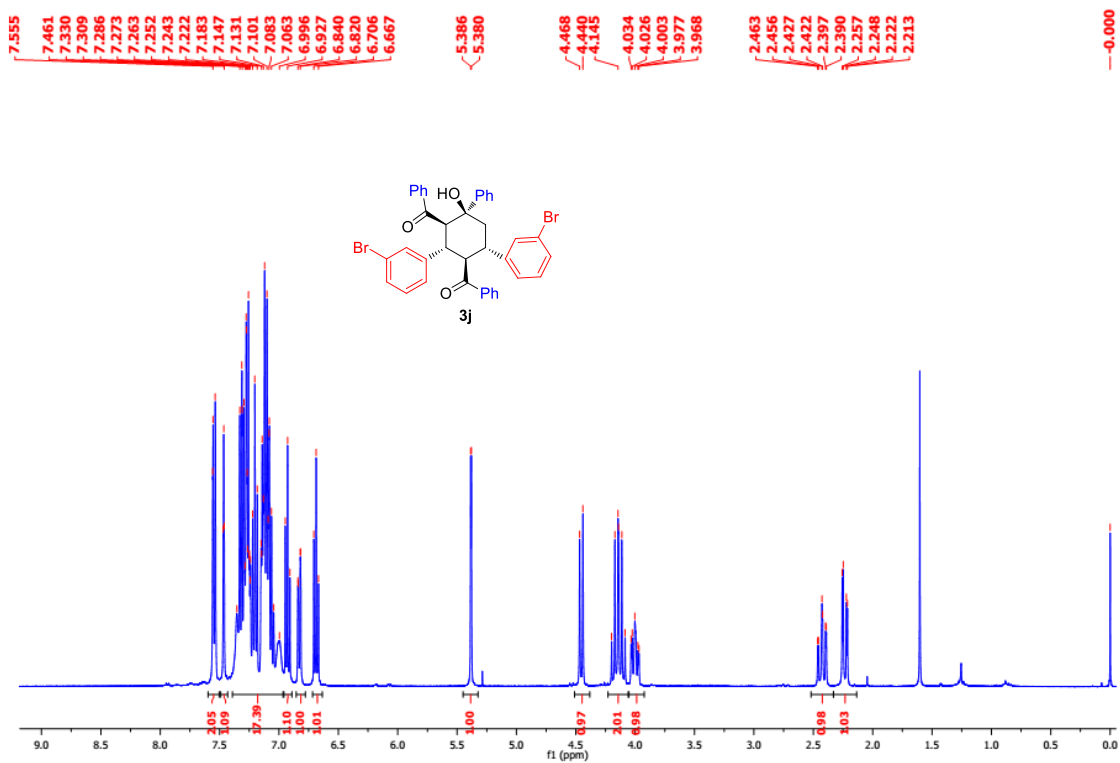

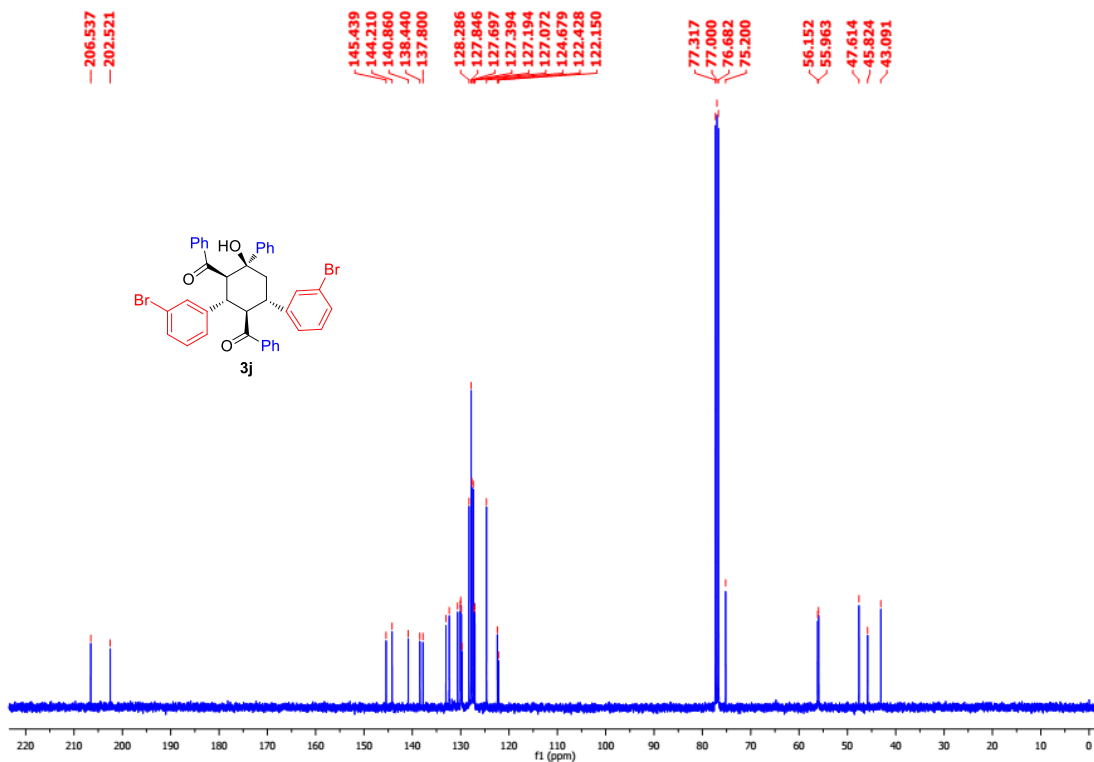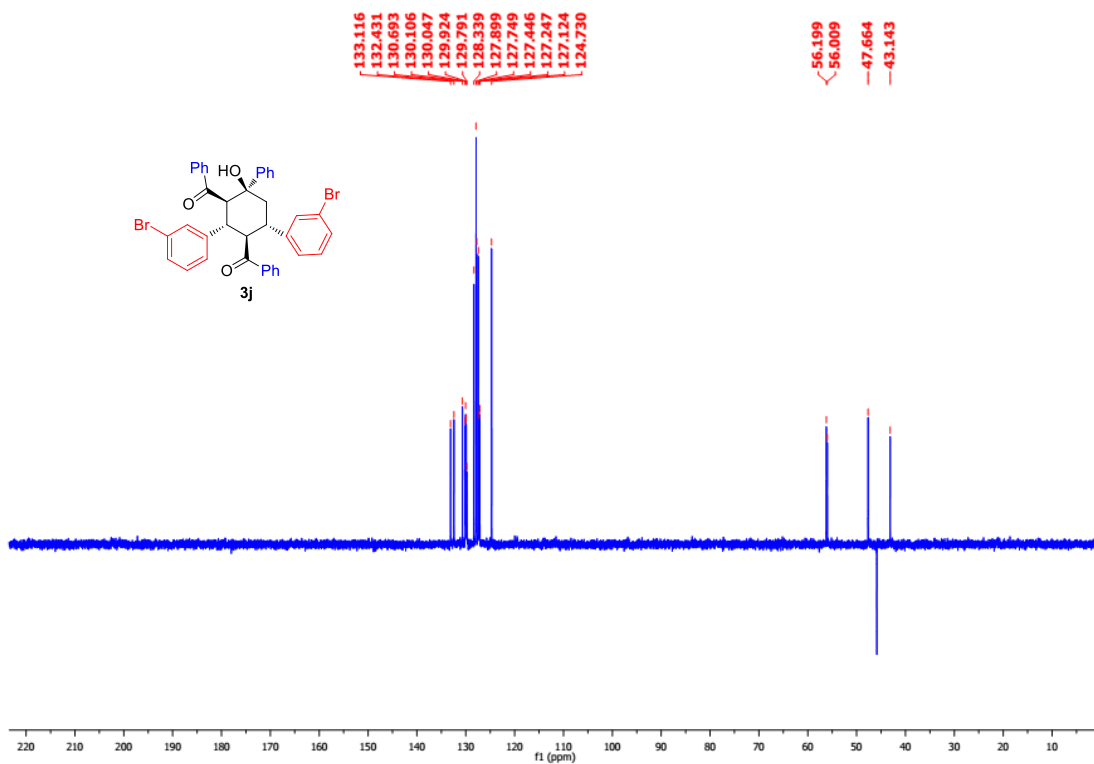

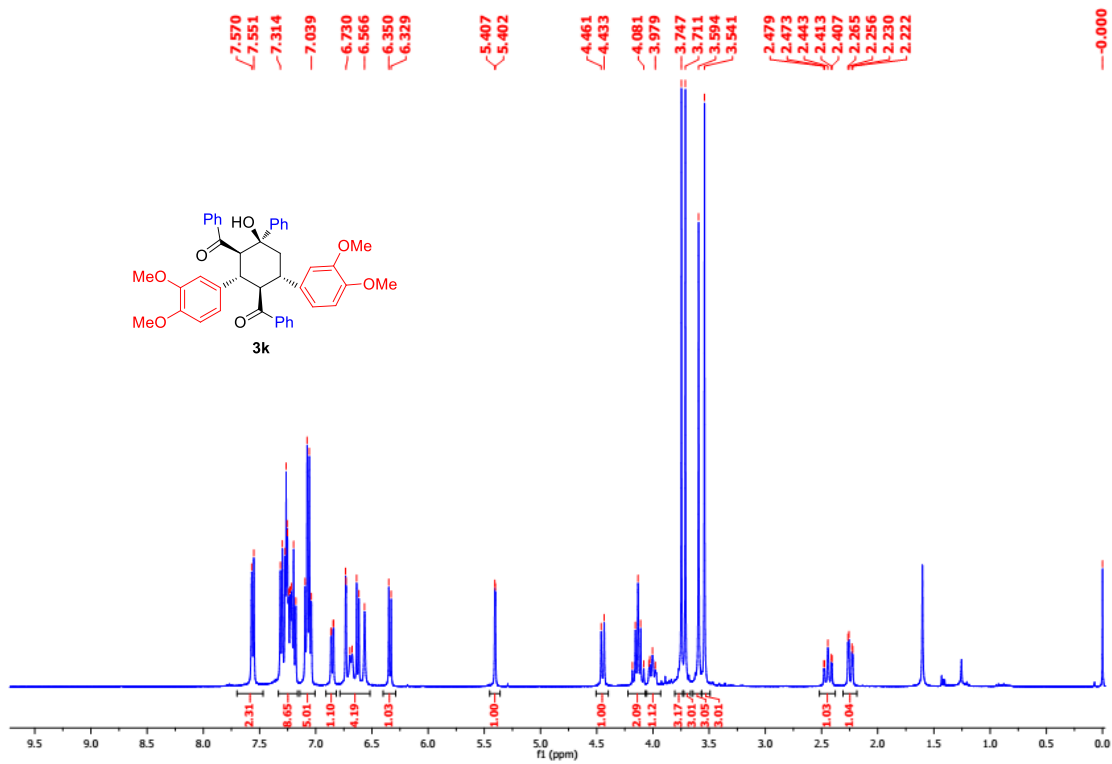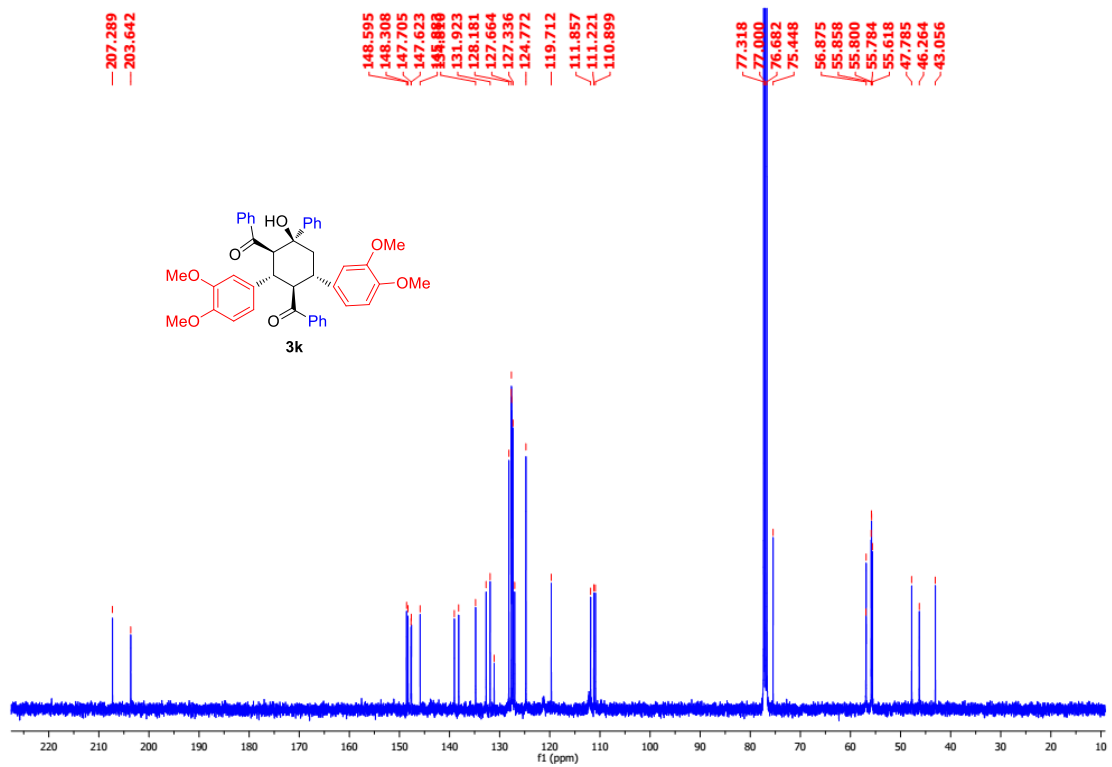

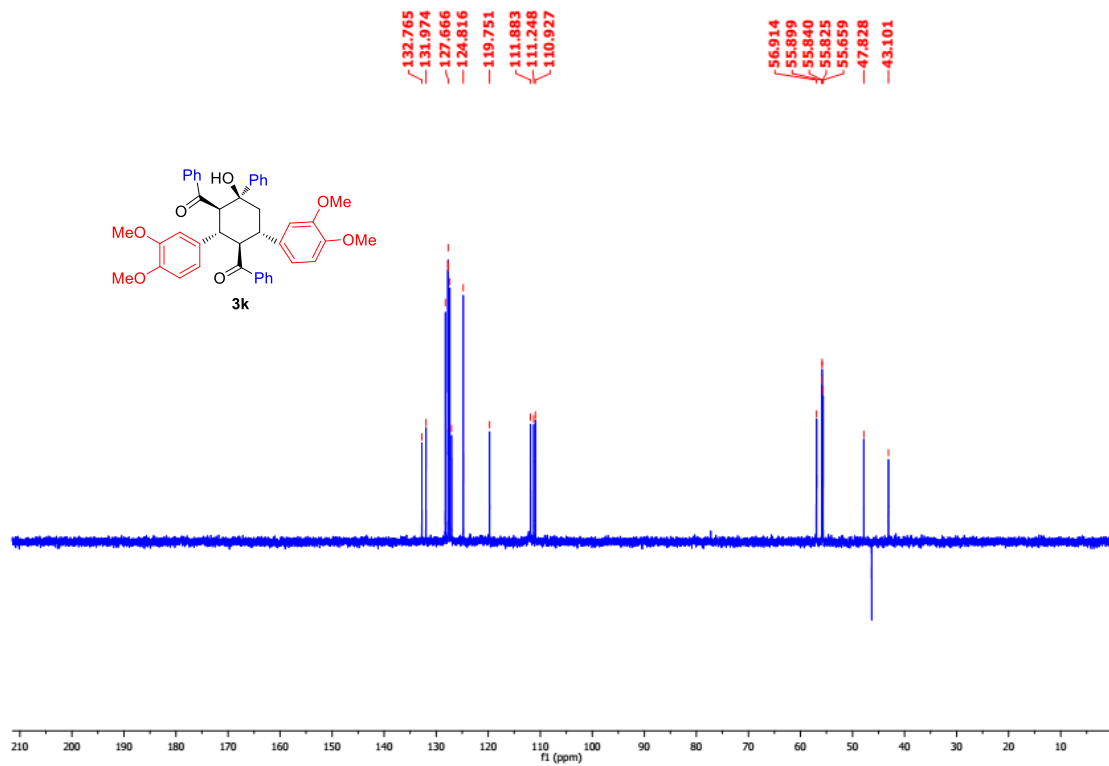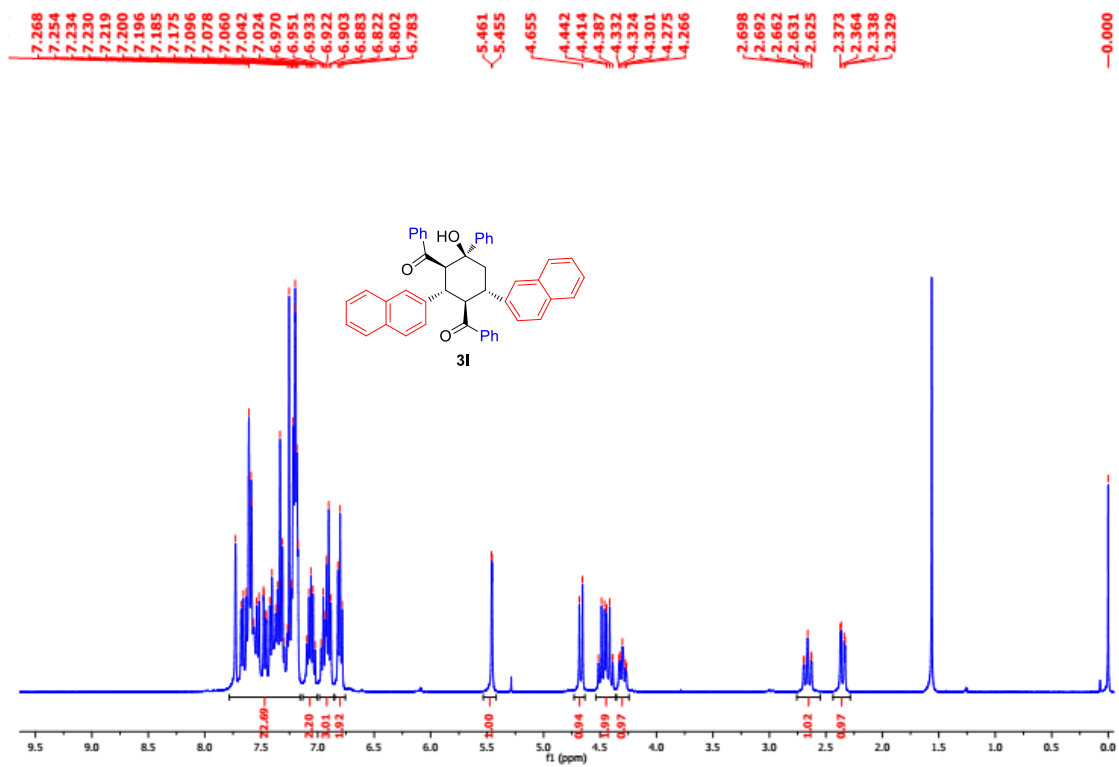

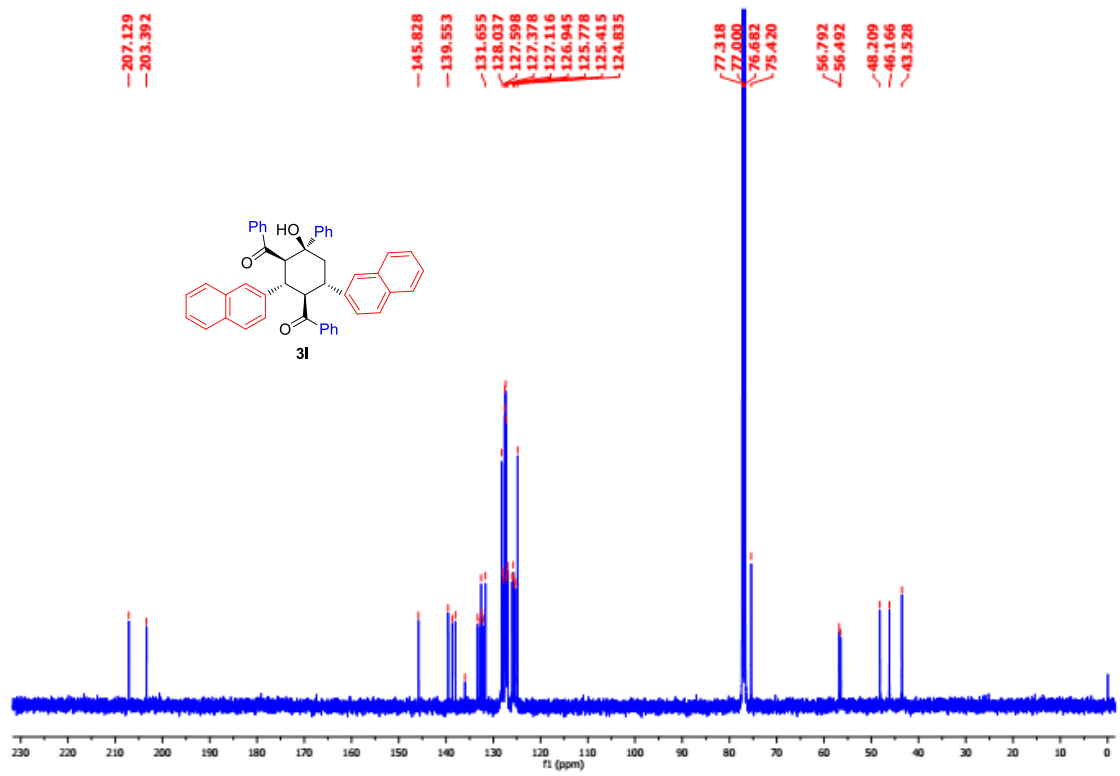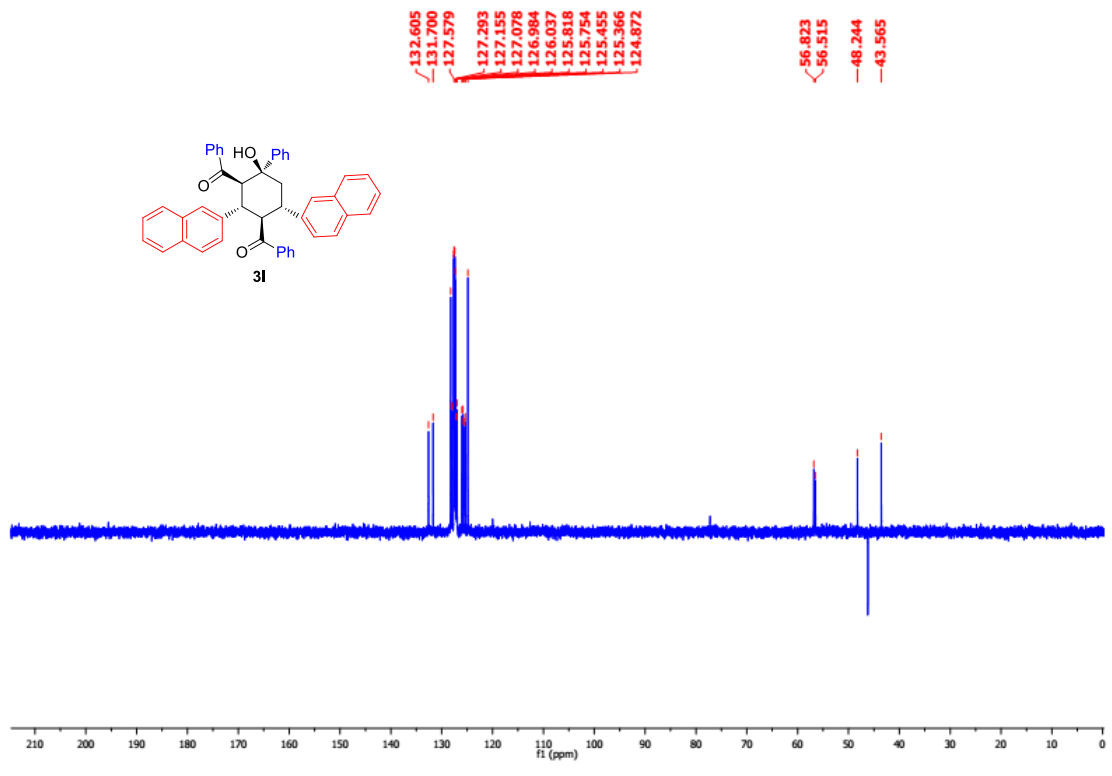

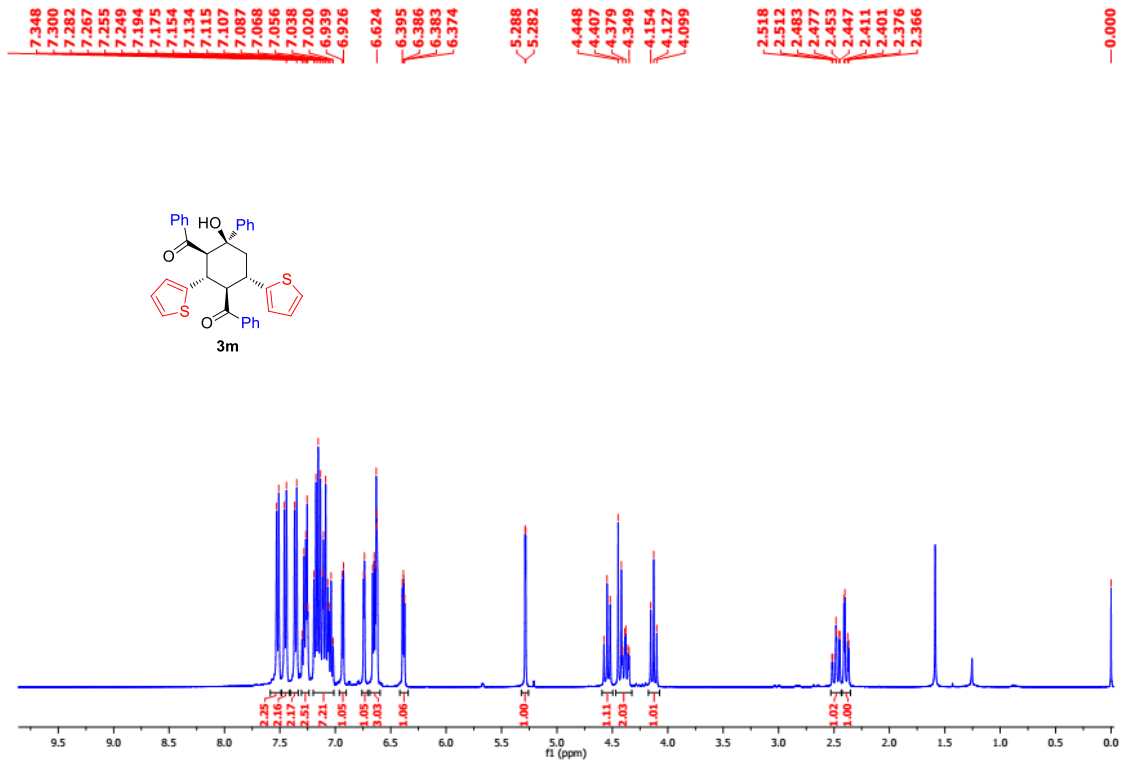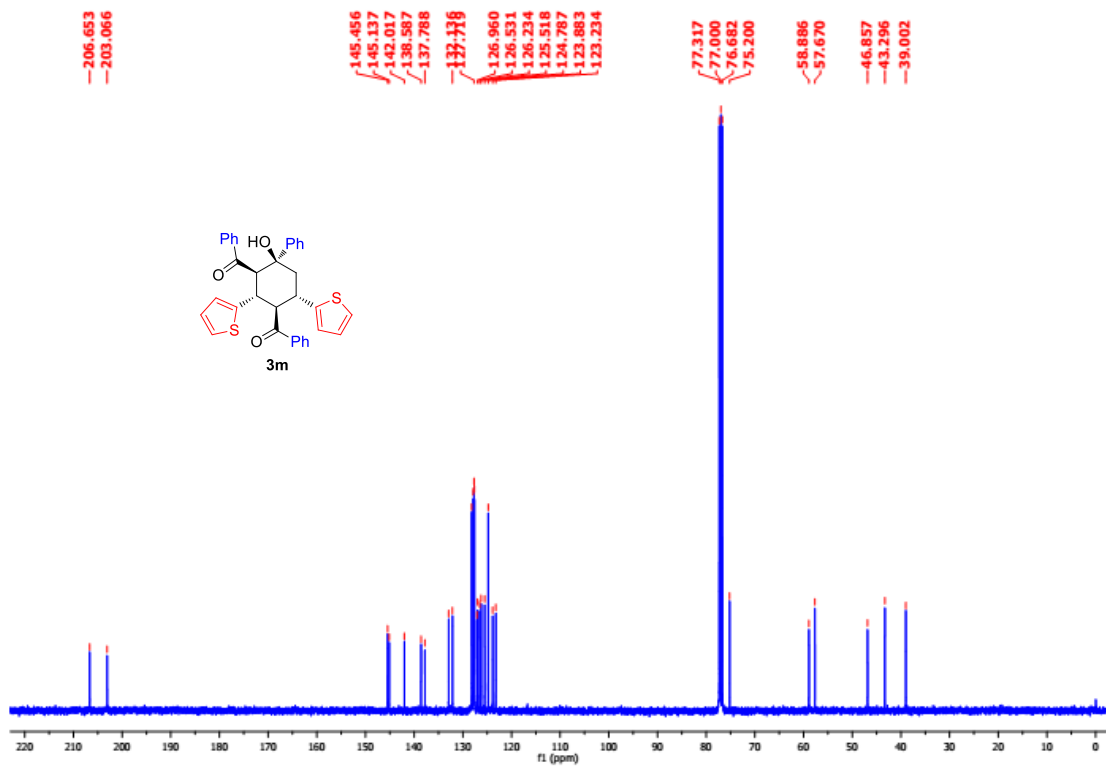

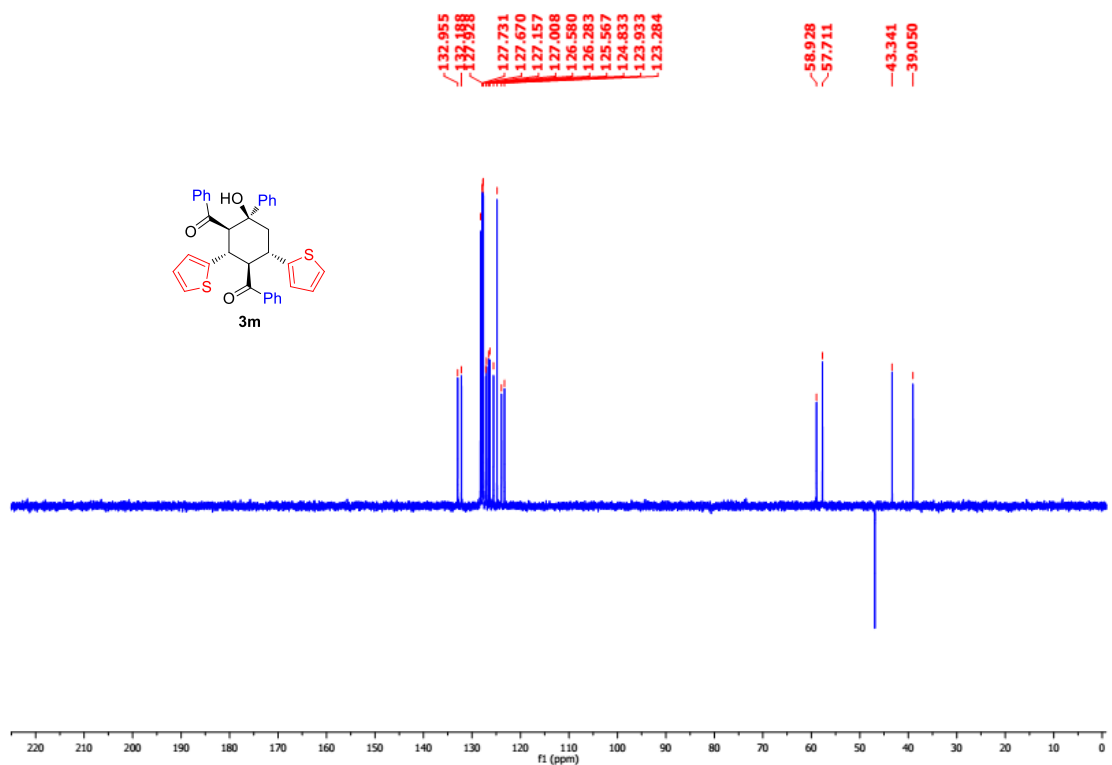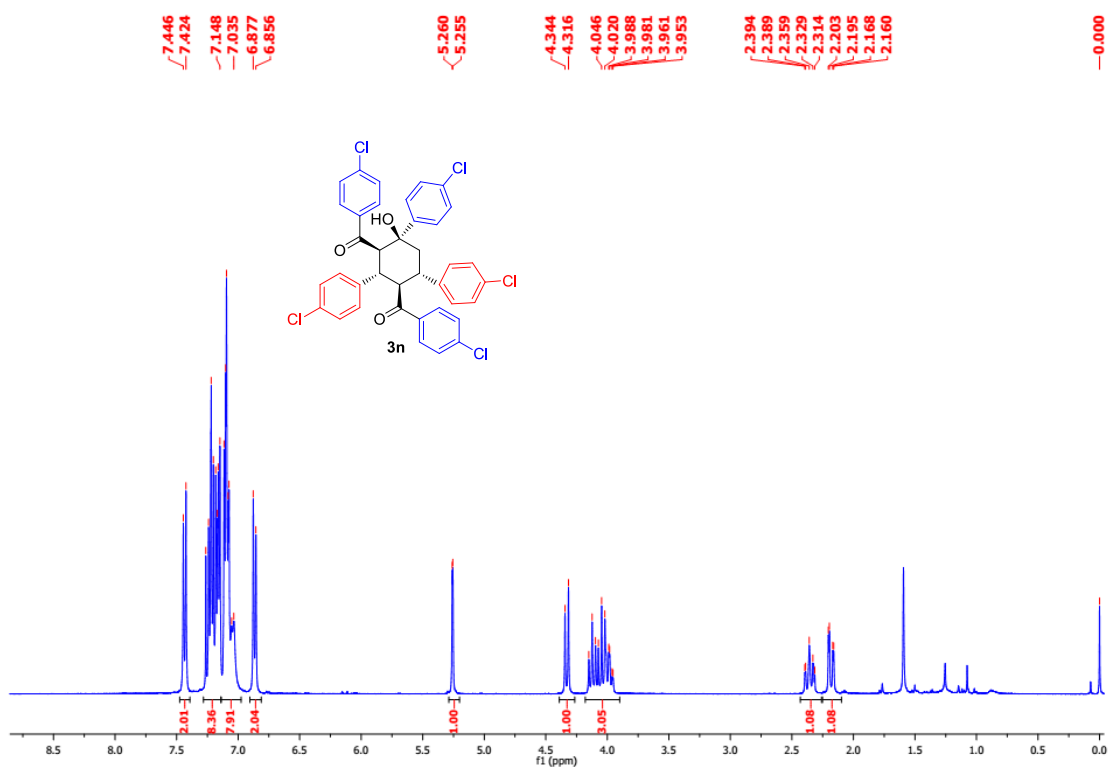



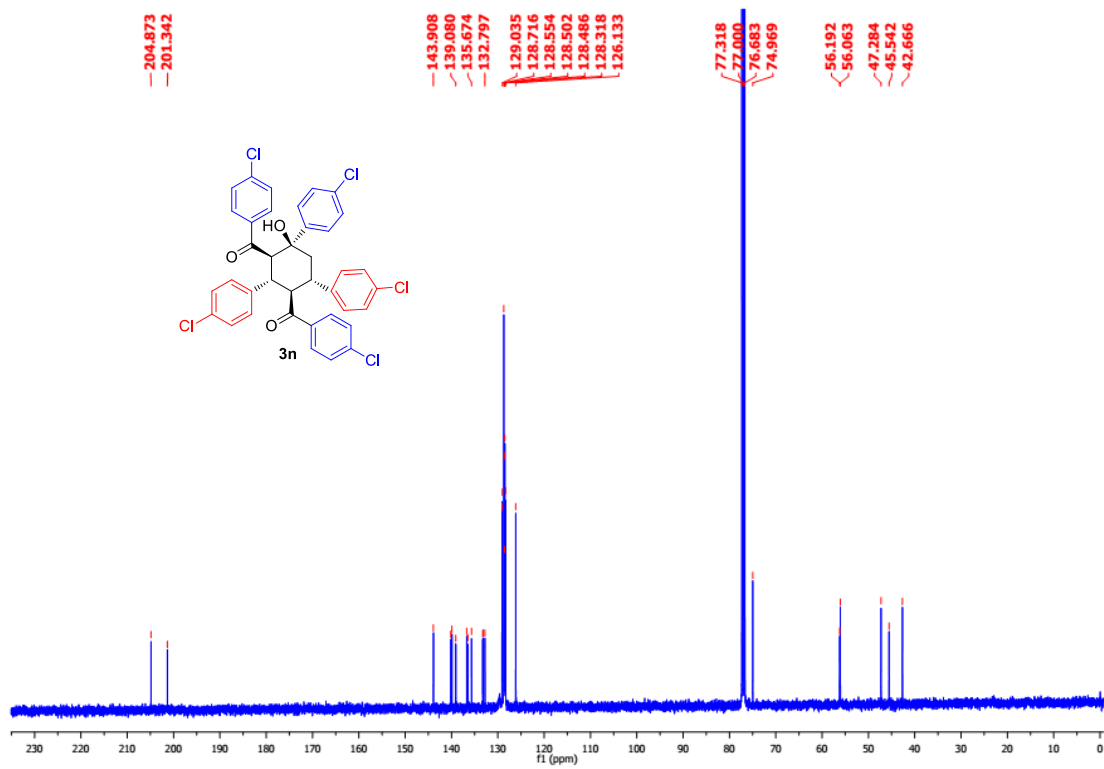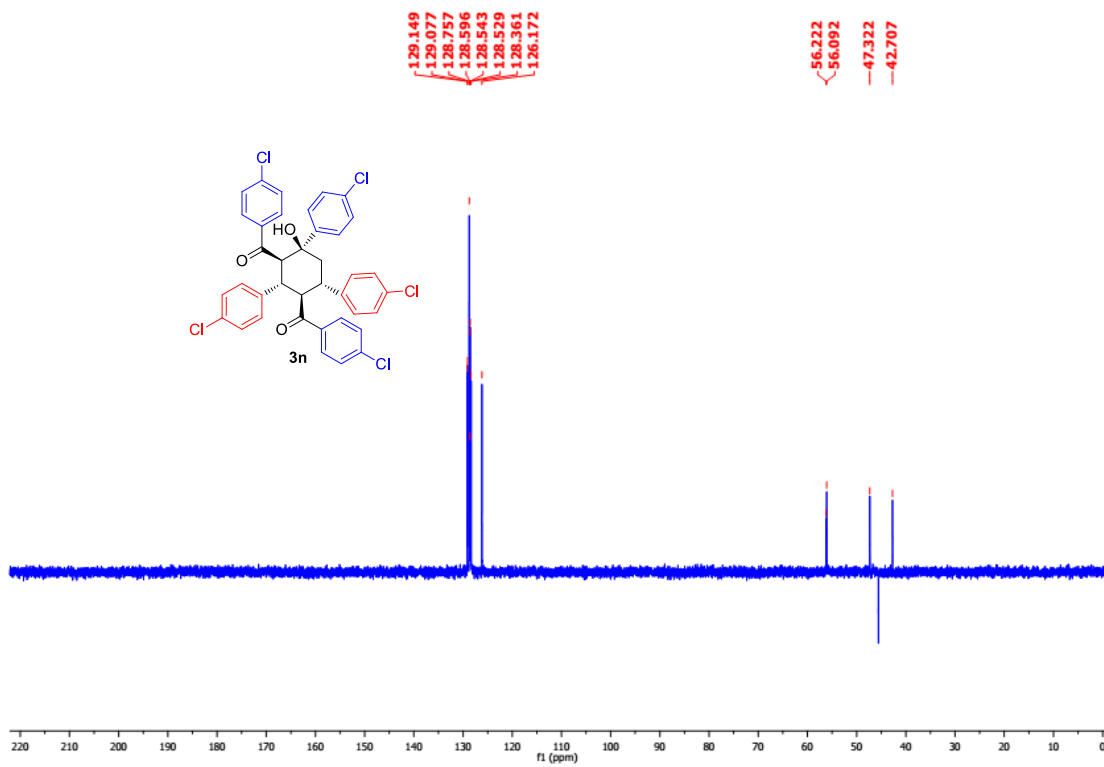

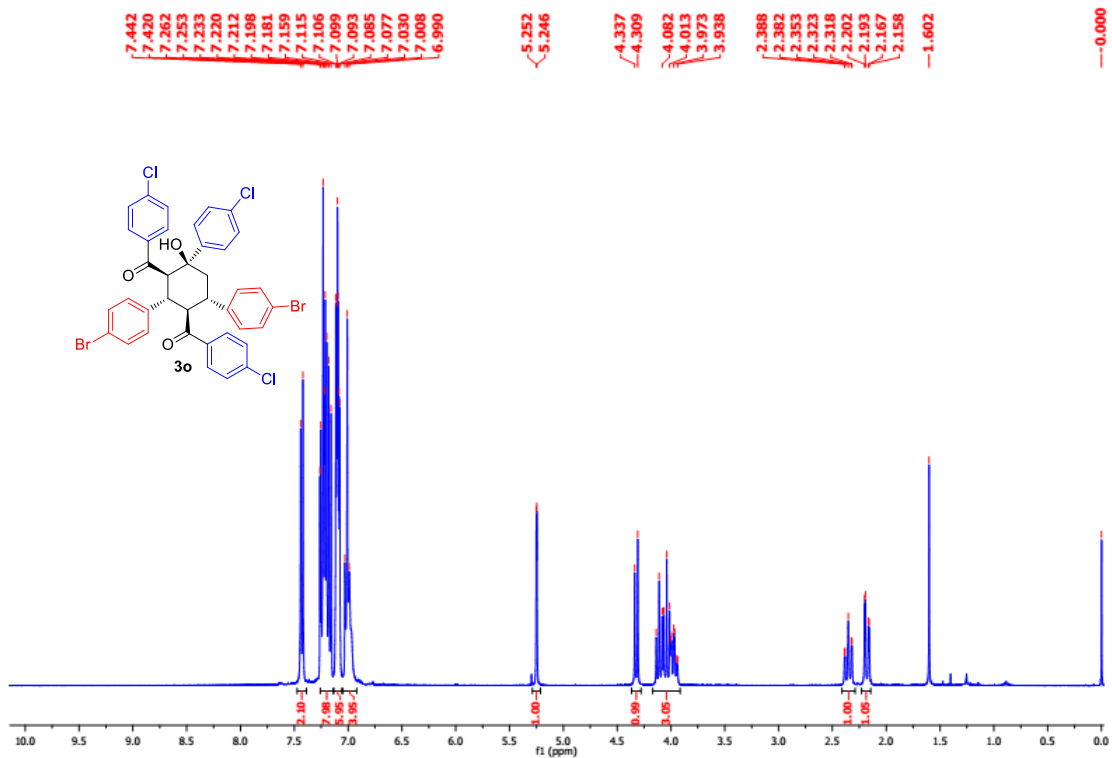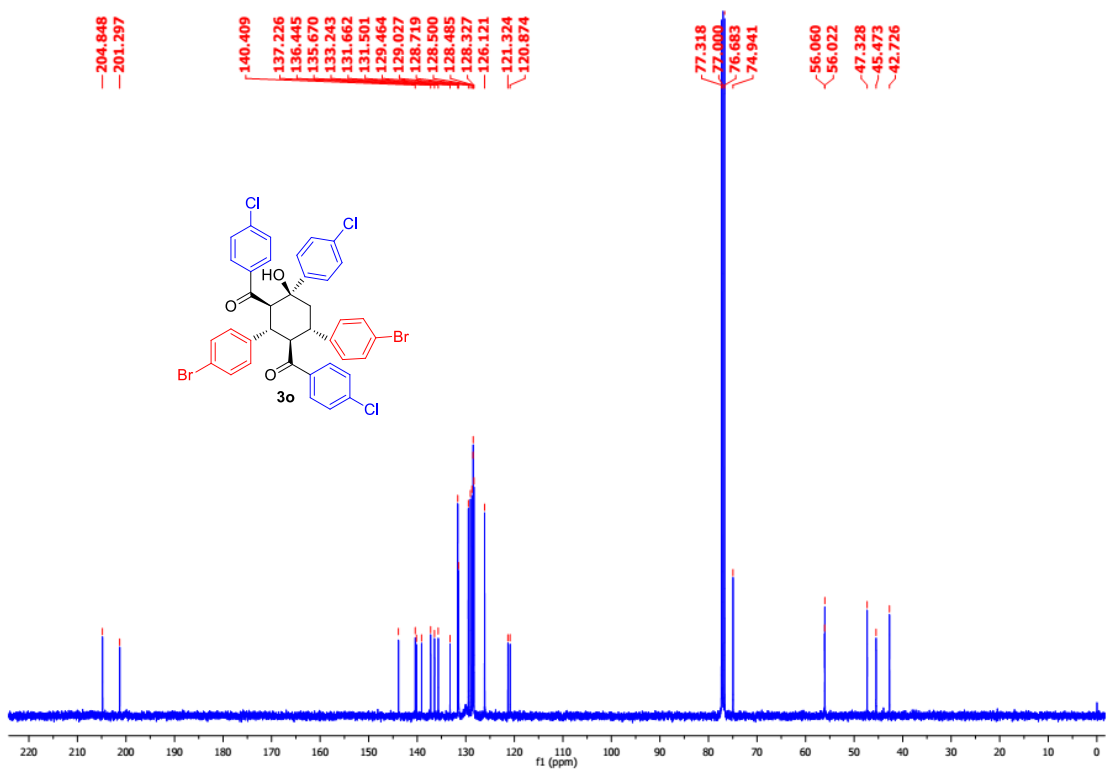

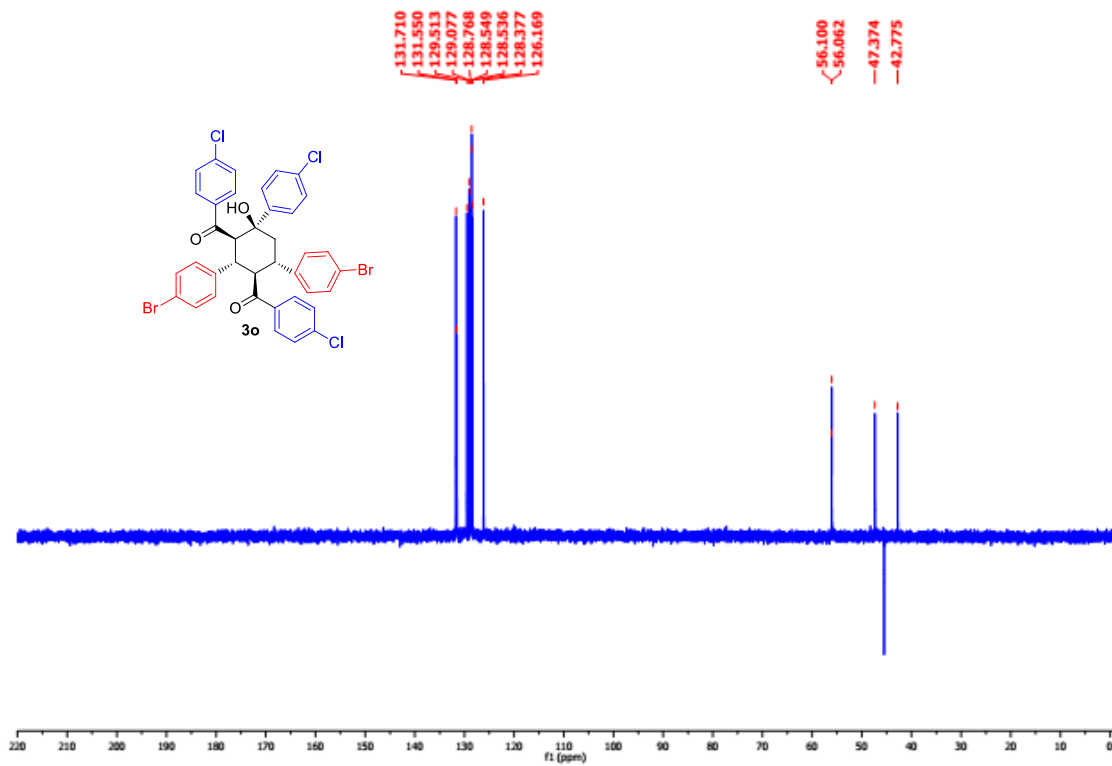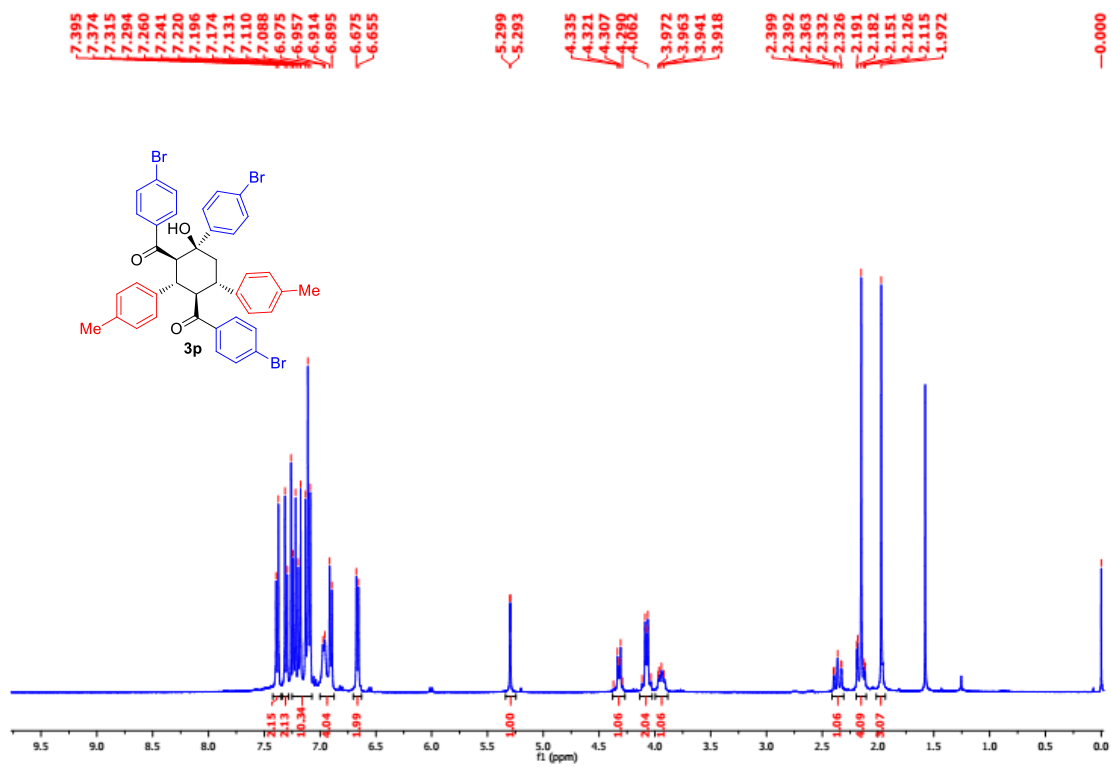

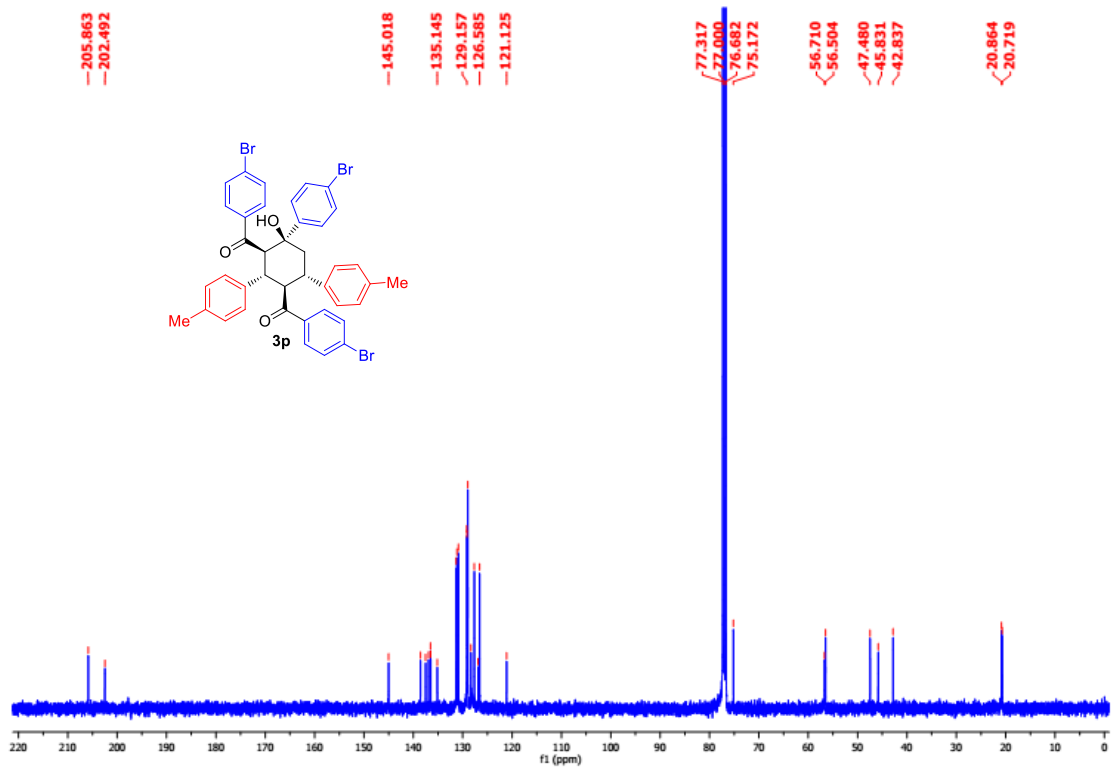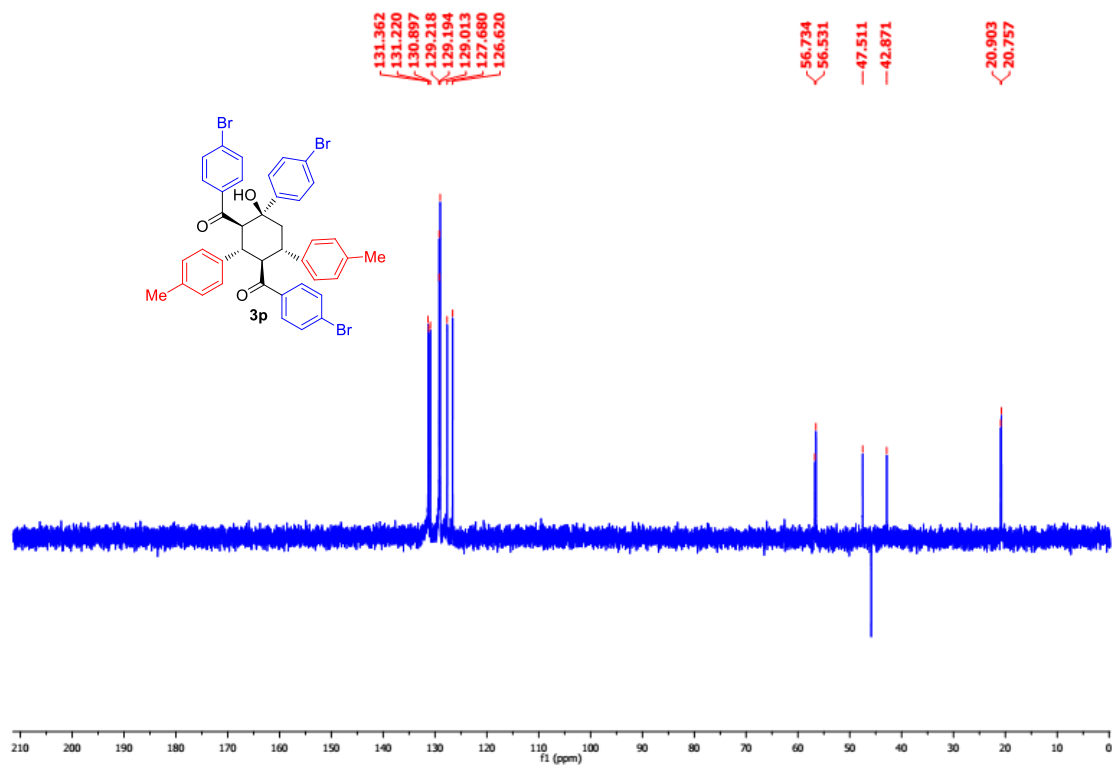

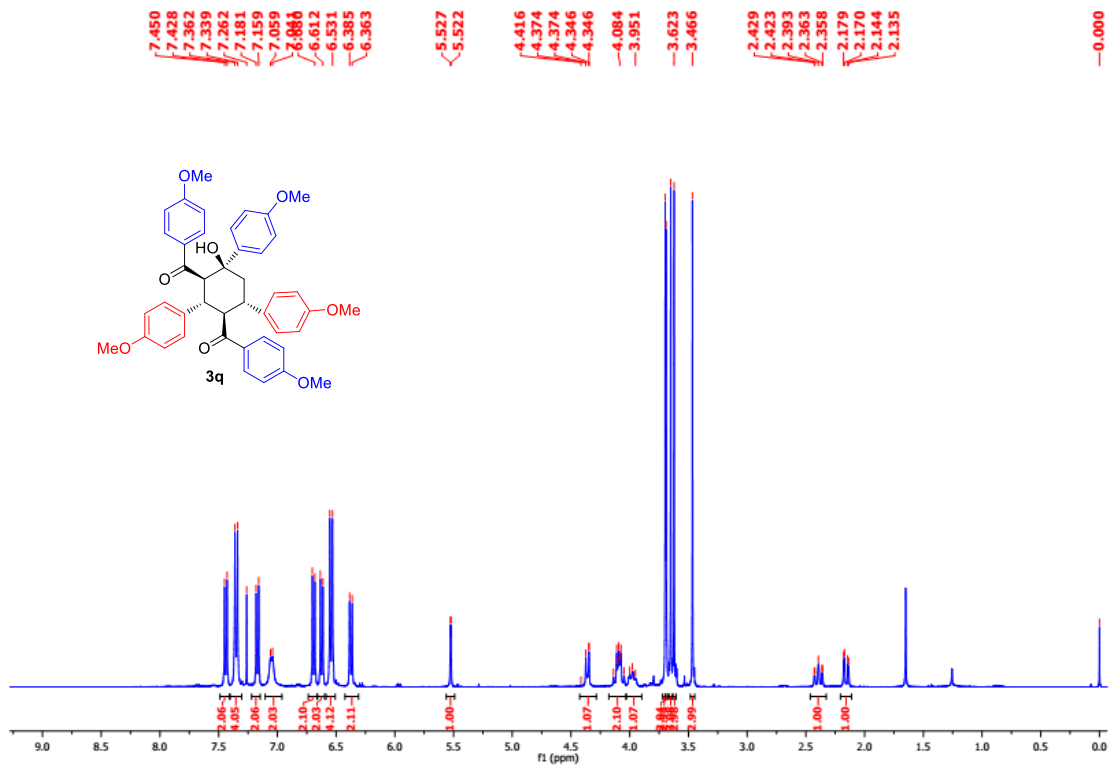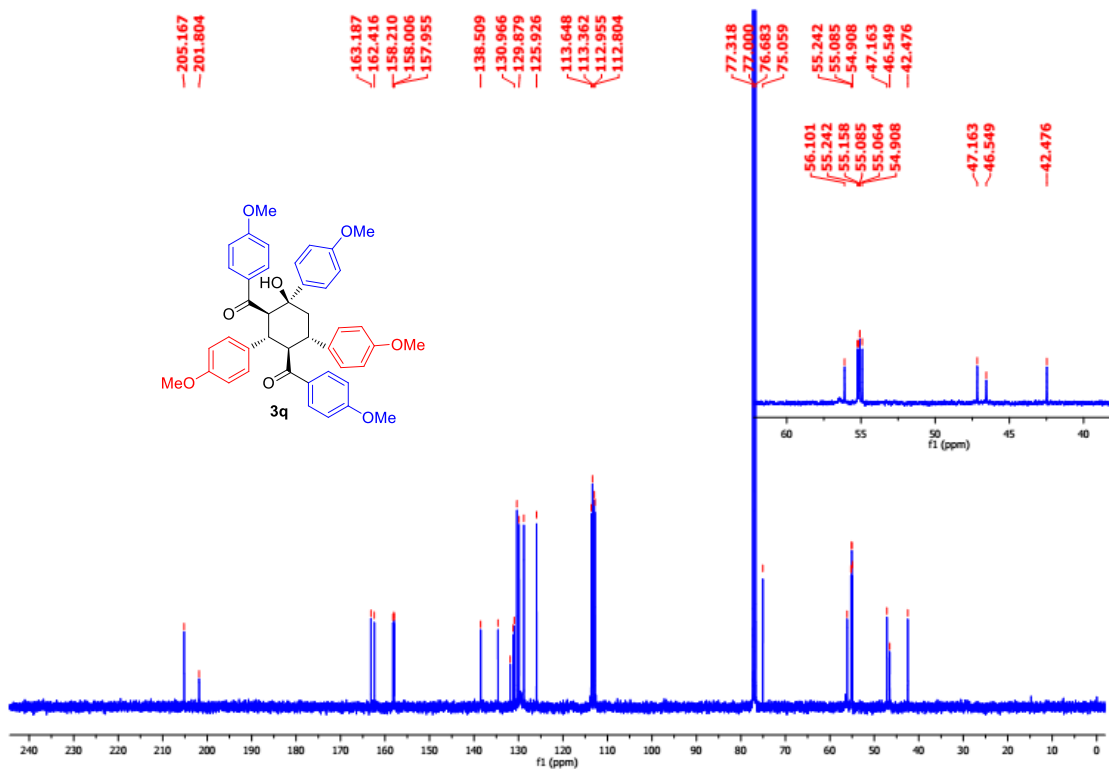

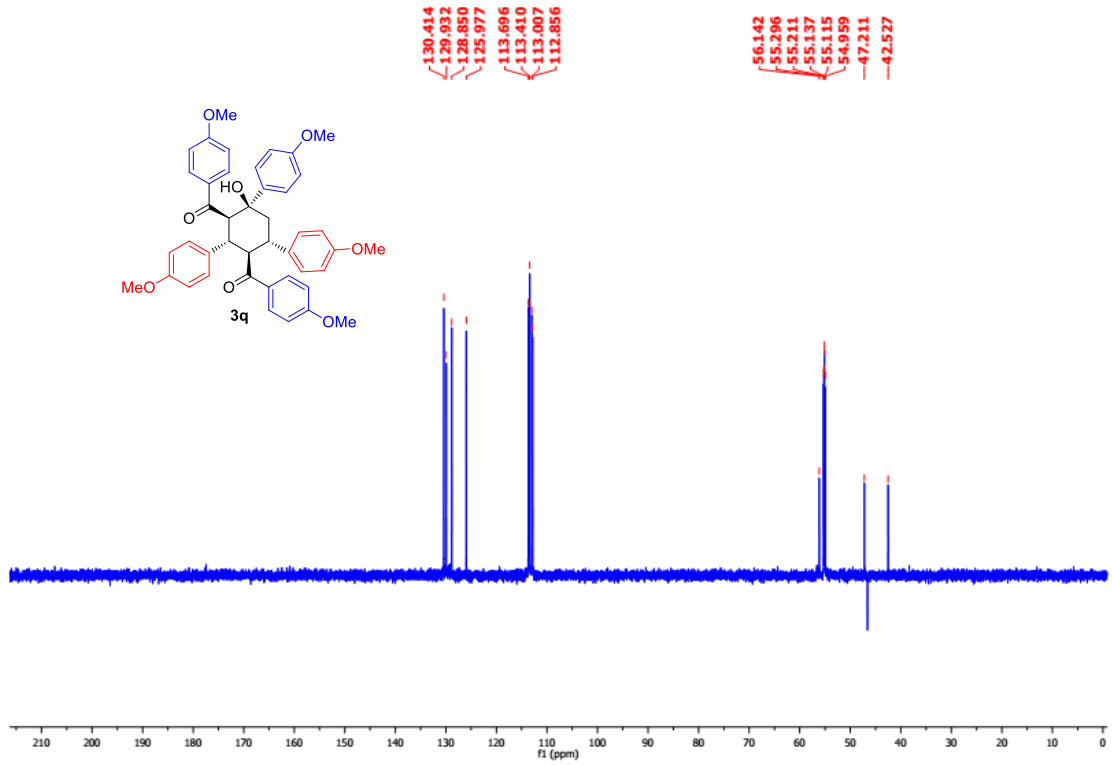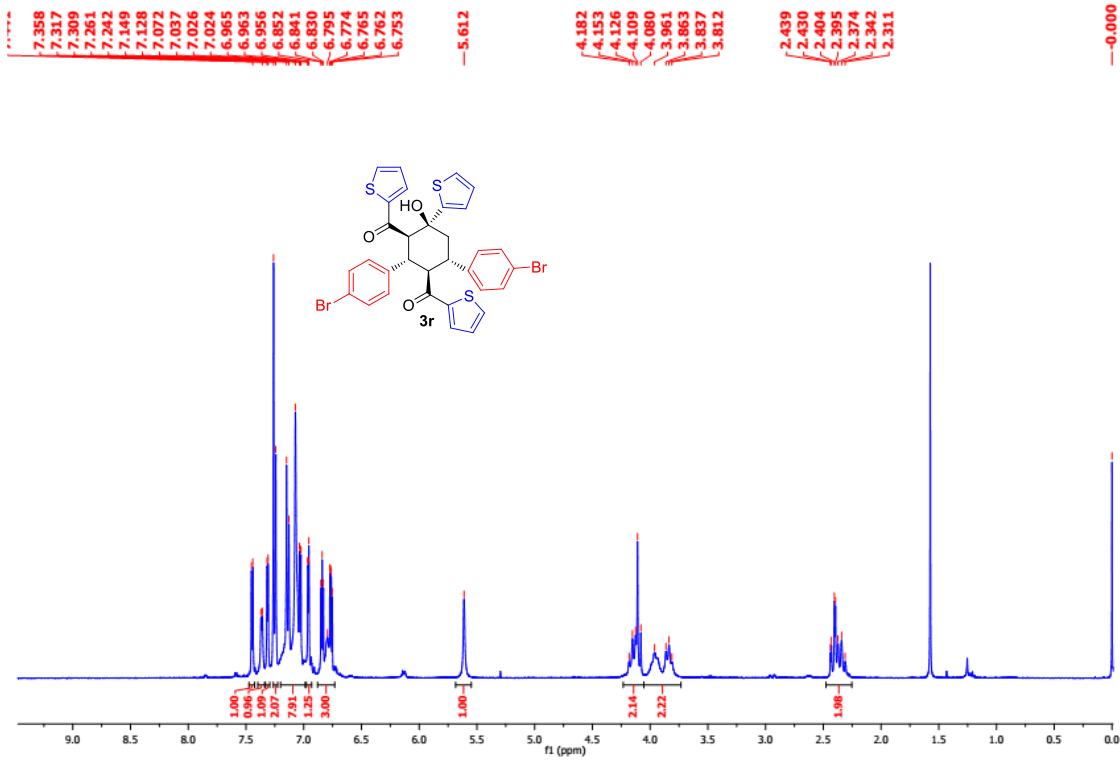

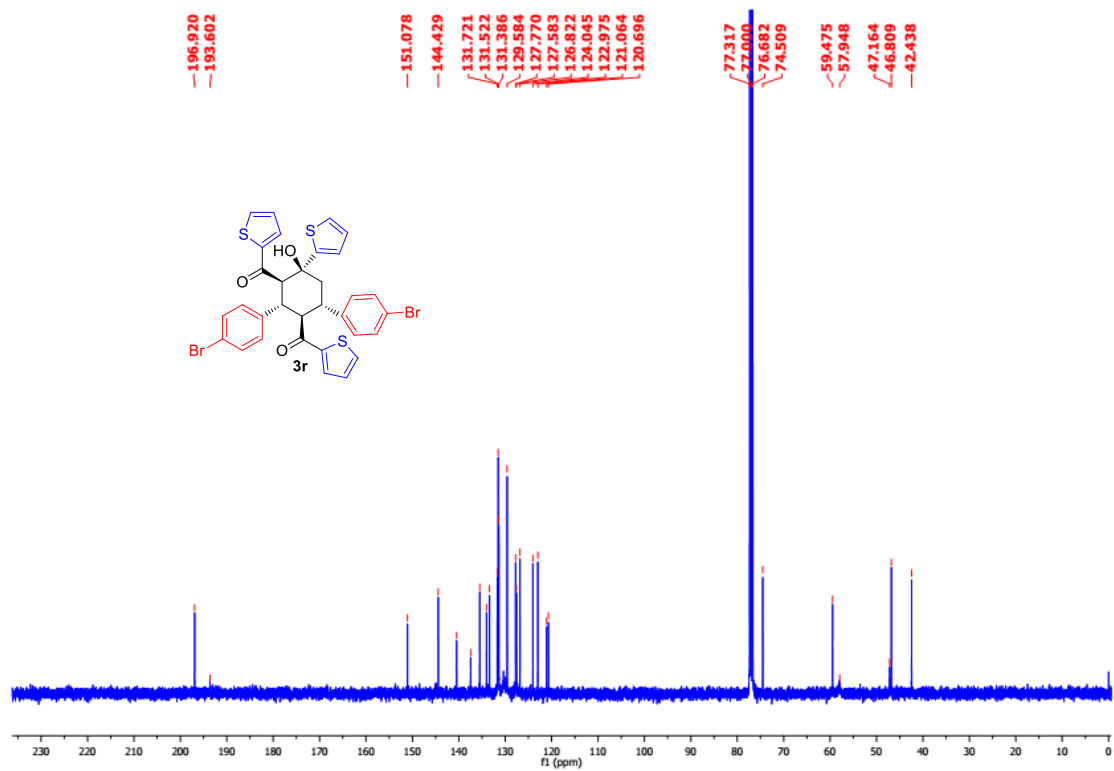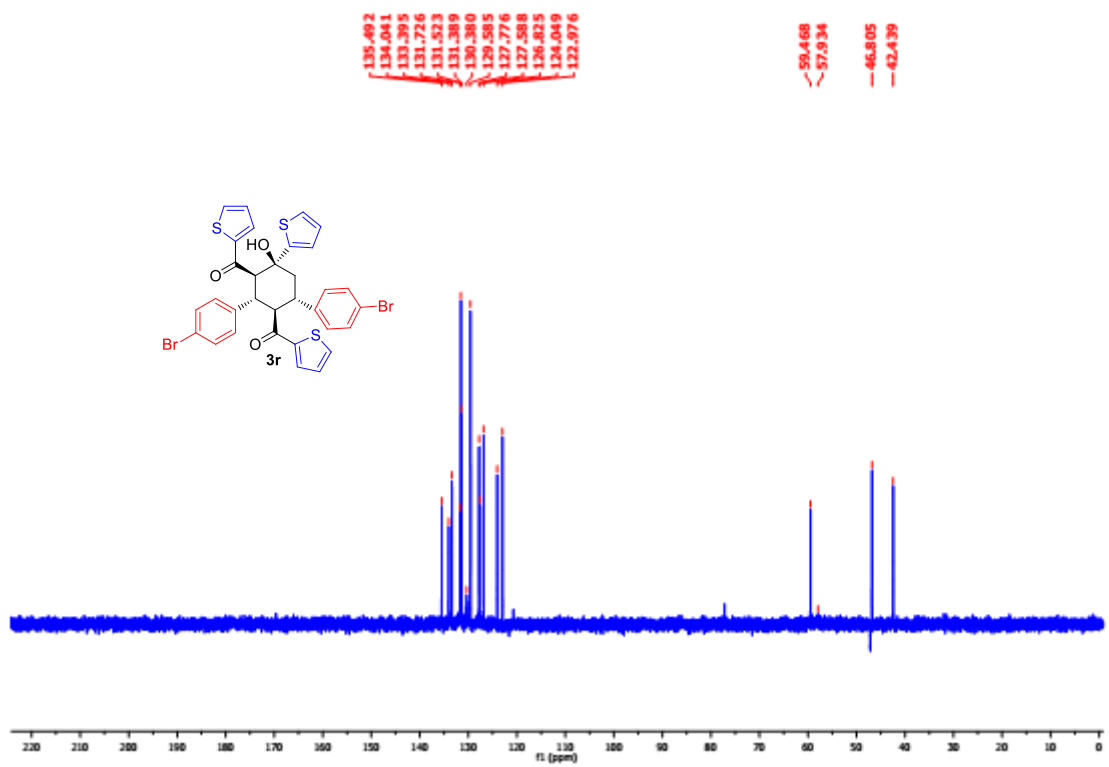

Supplement: c6qo00738d1.pdf [file c6qo00738d1.pdf]
